# Supplementary material for: Aerobic oxidation of 5-hydroxymethylfurfural to 5-hydroxymethyl-2-furancarboxylic acid and its derivatives by heterogeneous NHC-catalysis
Source: Royal Society of Chemistry journal article supplement (doi:10.1039/c8ob02425a), 2018-01-01

## Electronic Supporting Information

### Aerobic Oxidation of 5-Hydroxymethylfurfural to 5-Hydroxymethyl-2-furancarboxylic Acid and Derivatives by Heterogeneous NHC-Catalysis

Arianna Brandolese,<sup>a</sup> Daniele Ragno,<sup>a</sup> Graziano Di Carmine,<sup>a</sup> Tatiana Bernardi,<sup>a</sup> Olga Bortolini,<sup>a</sup> Pier Paolo Giovannini,<sup>a</sup> Omar Ginoble Pandoli,<sup>b</sup> Alessandra Altomare, and Alessandro Massi<sup>\*a</sup>

<sup>a</sup>*Dipartimento di Scienze Chimiche e Farmaceutiche, Università di Ferrara, Via Luigi Borsari, 46, I-44121 Ferrara (Italy)*

<sup>b</sup>*Chemistry Department, PUC-Rio, Rio de Janeiro, Brazil*

<sup>c</sup>*Department of Pharmaceutical Sciences, University of Milan, Via Mangiagalli 25, I-20133 Milano (Italy)*

[alessandro.massi@unife.it](mailto:alessandro.massi@unife.it)

#### Table of content:

|                                                                                                                   |    |
|-------------------------------------------------------------------------------------------------------------------|----|
| <sup>1</sup> H NMR and <sup>13</sup> C NMR spectra of <b>poly-HMFCA-Me-ester</b> (Figure S1)                      | S2 |
| MS/MS spectrum of <b>poly-HMFCA</b> (Figure S2)                                                                   | S3 |
| <sup>1</sup> H NMR and <sup>13</sup> C NMR spectra of <b>poly-HMFCA</b> , <b>HMFCFA</b> and compounds <b>4-12</b> | S4 |

**Figure S1.**  $^1\text{H}$  (300 MHz) and  $^{13}\text{C}$  (101 MHz) spectra ( $\text{CDCl}_3$ ) of **poly-HMFCA-Me-ester**

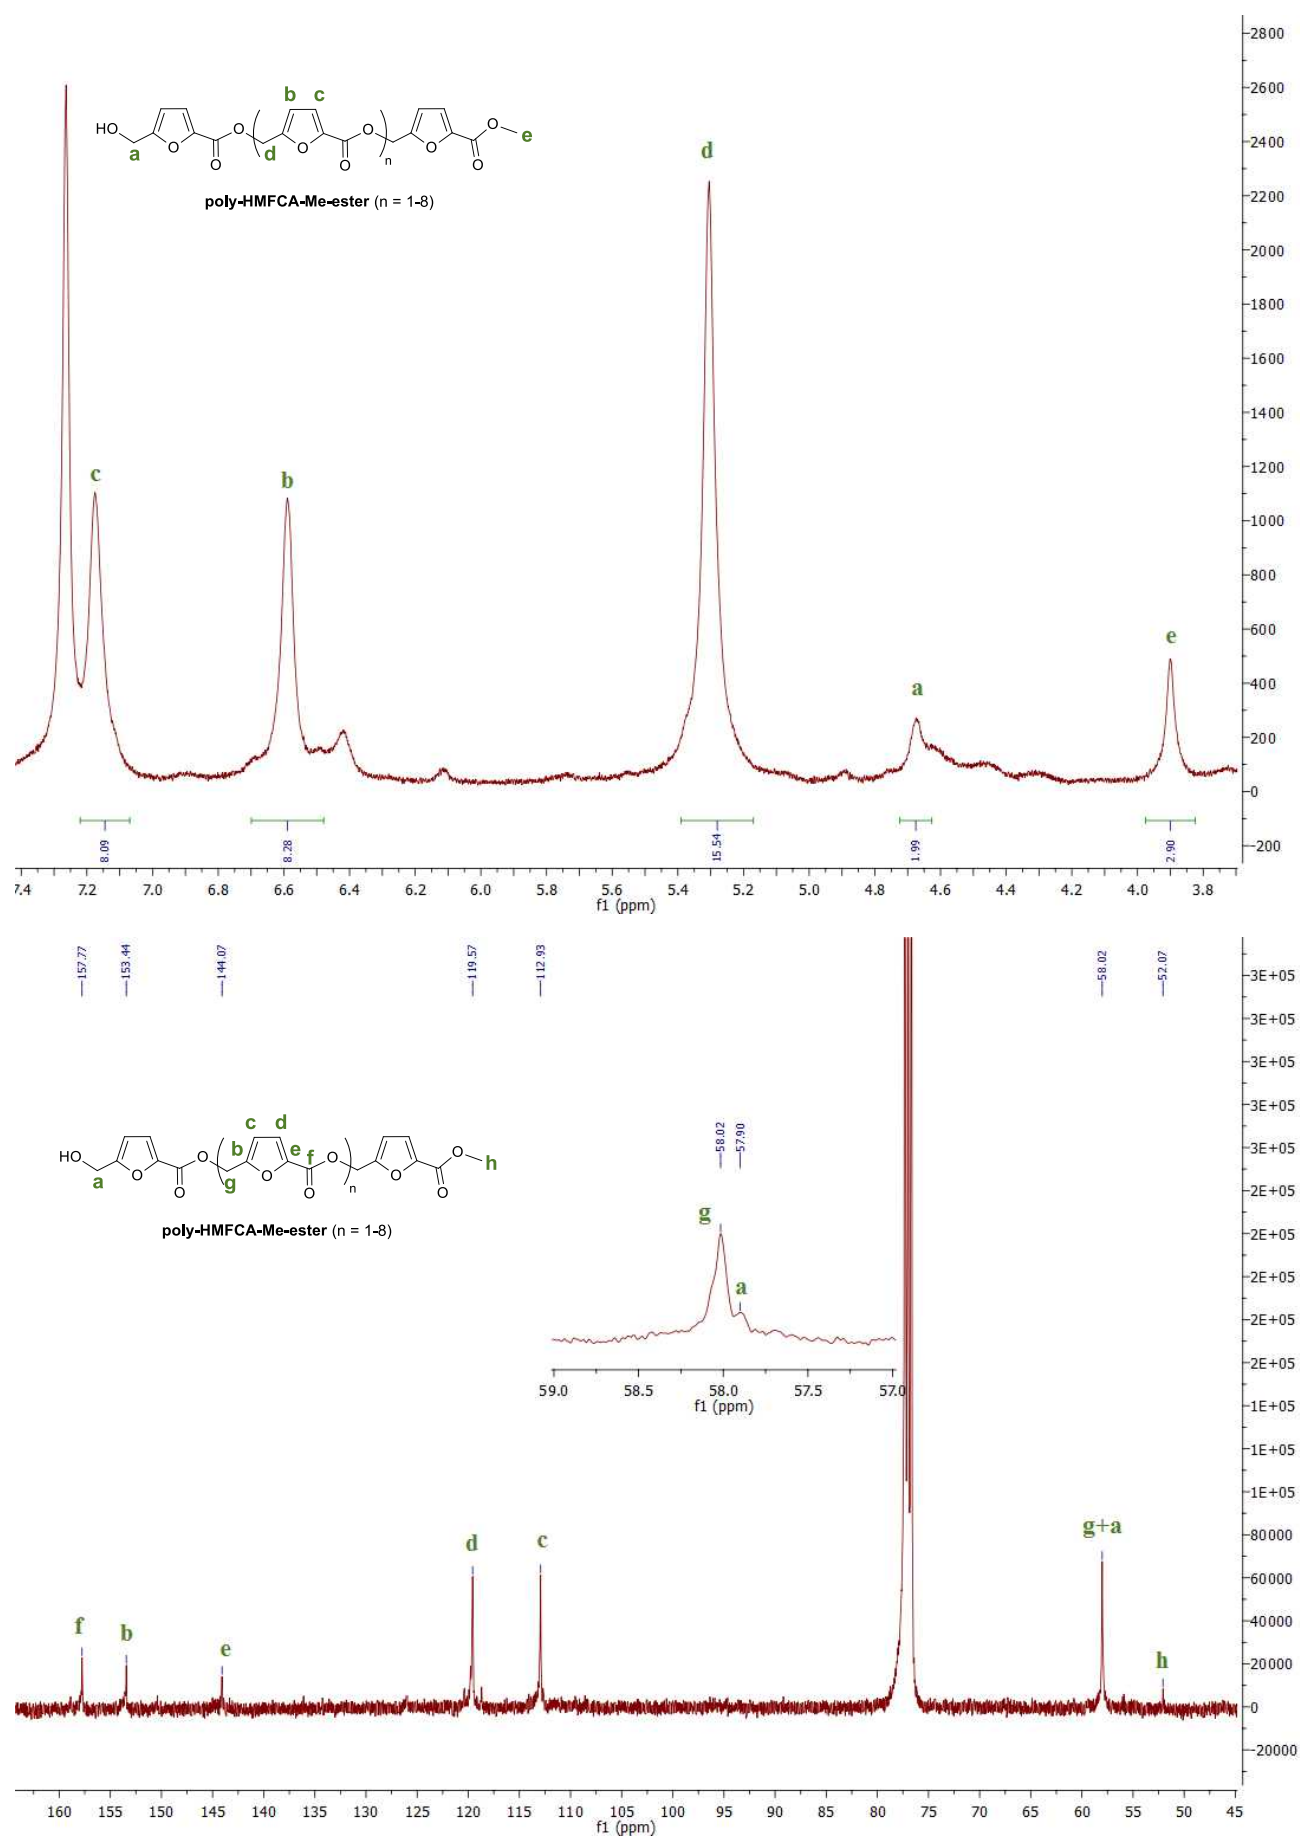

**Figure S2. Poly-HMFCA MS/MS mass spectrum of selected ion at  $m/z$  885.**

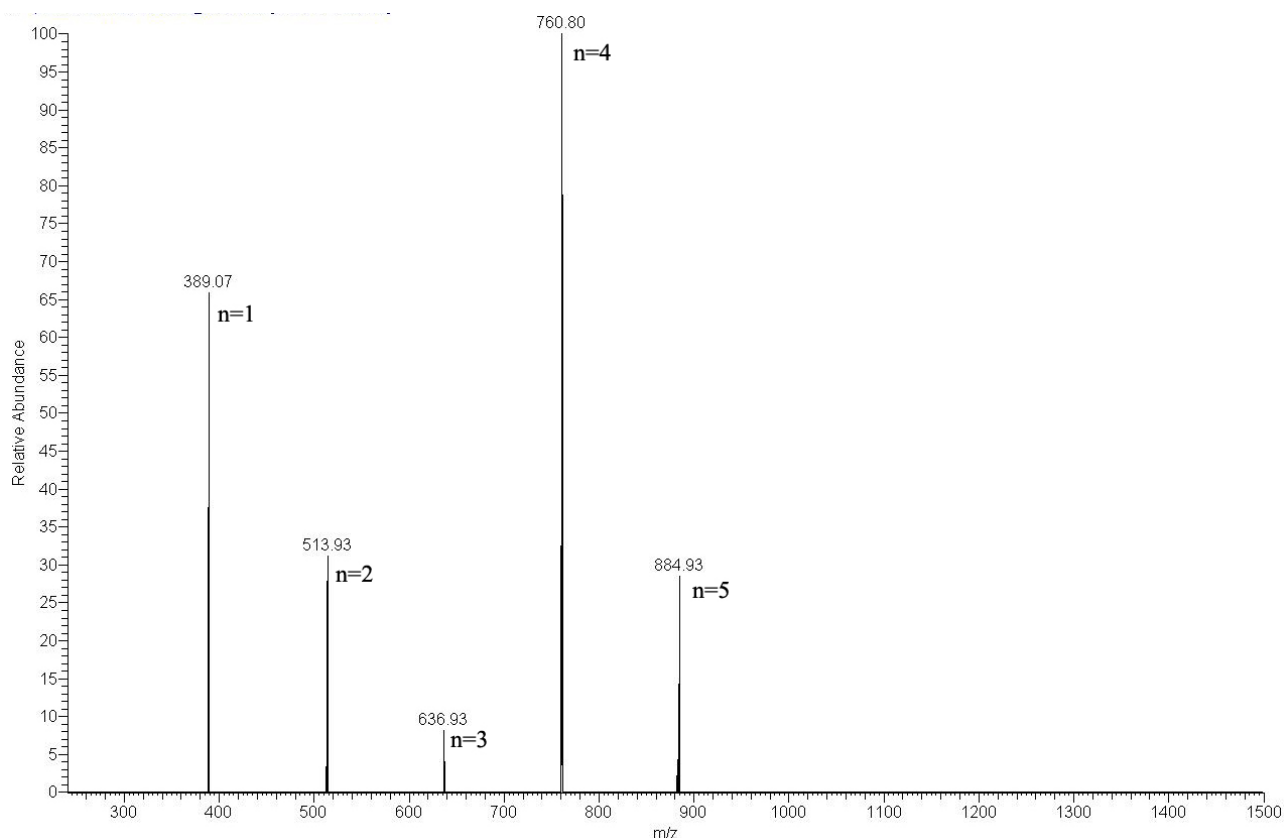

(Mass Spectrometry analyses were performed on ESI–LCQ Duo (Electrospray ionization source and Ion Trap detector, Thermo Scientific, Waltham (MS), USA) equipped with a syringe pump delivery by directly infusion. The sample was dried under nitrogen flow and was made it up in methanol for mass analysis. The acquisitions were studied with 20  $\mu\text{L}/\text{sec}$  flow rate in negative mode, scanned from 500 nm to 2000 nm with following experimental conditions: ESI capillary voltage was 4,5 V, capillary temperature was 200  $^{\circ}\text{C}$  and capillary voltage -10 V.)

# <sup>1</sup>H (300 MHz) and <sup>13</sup>C (101 MHz) spectra (CDCl<sub>3</sub>) of poly-HMFCA

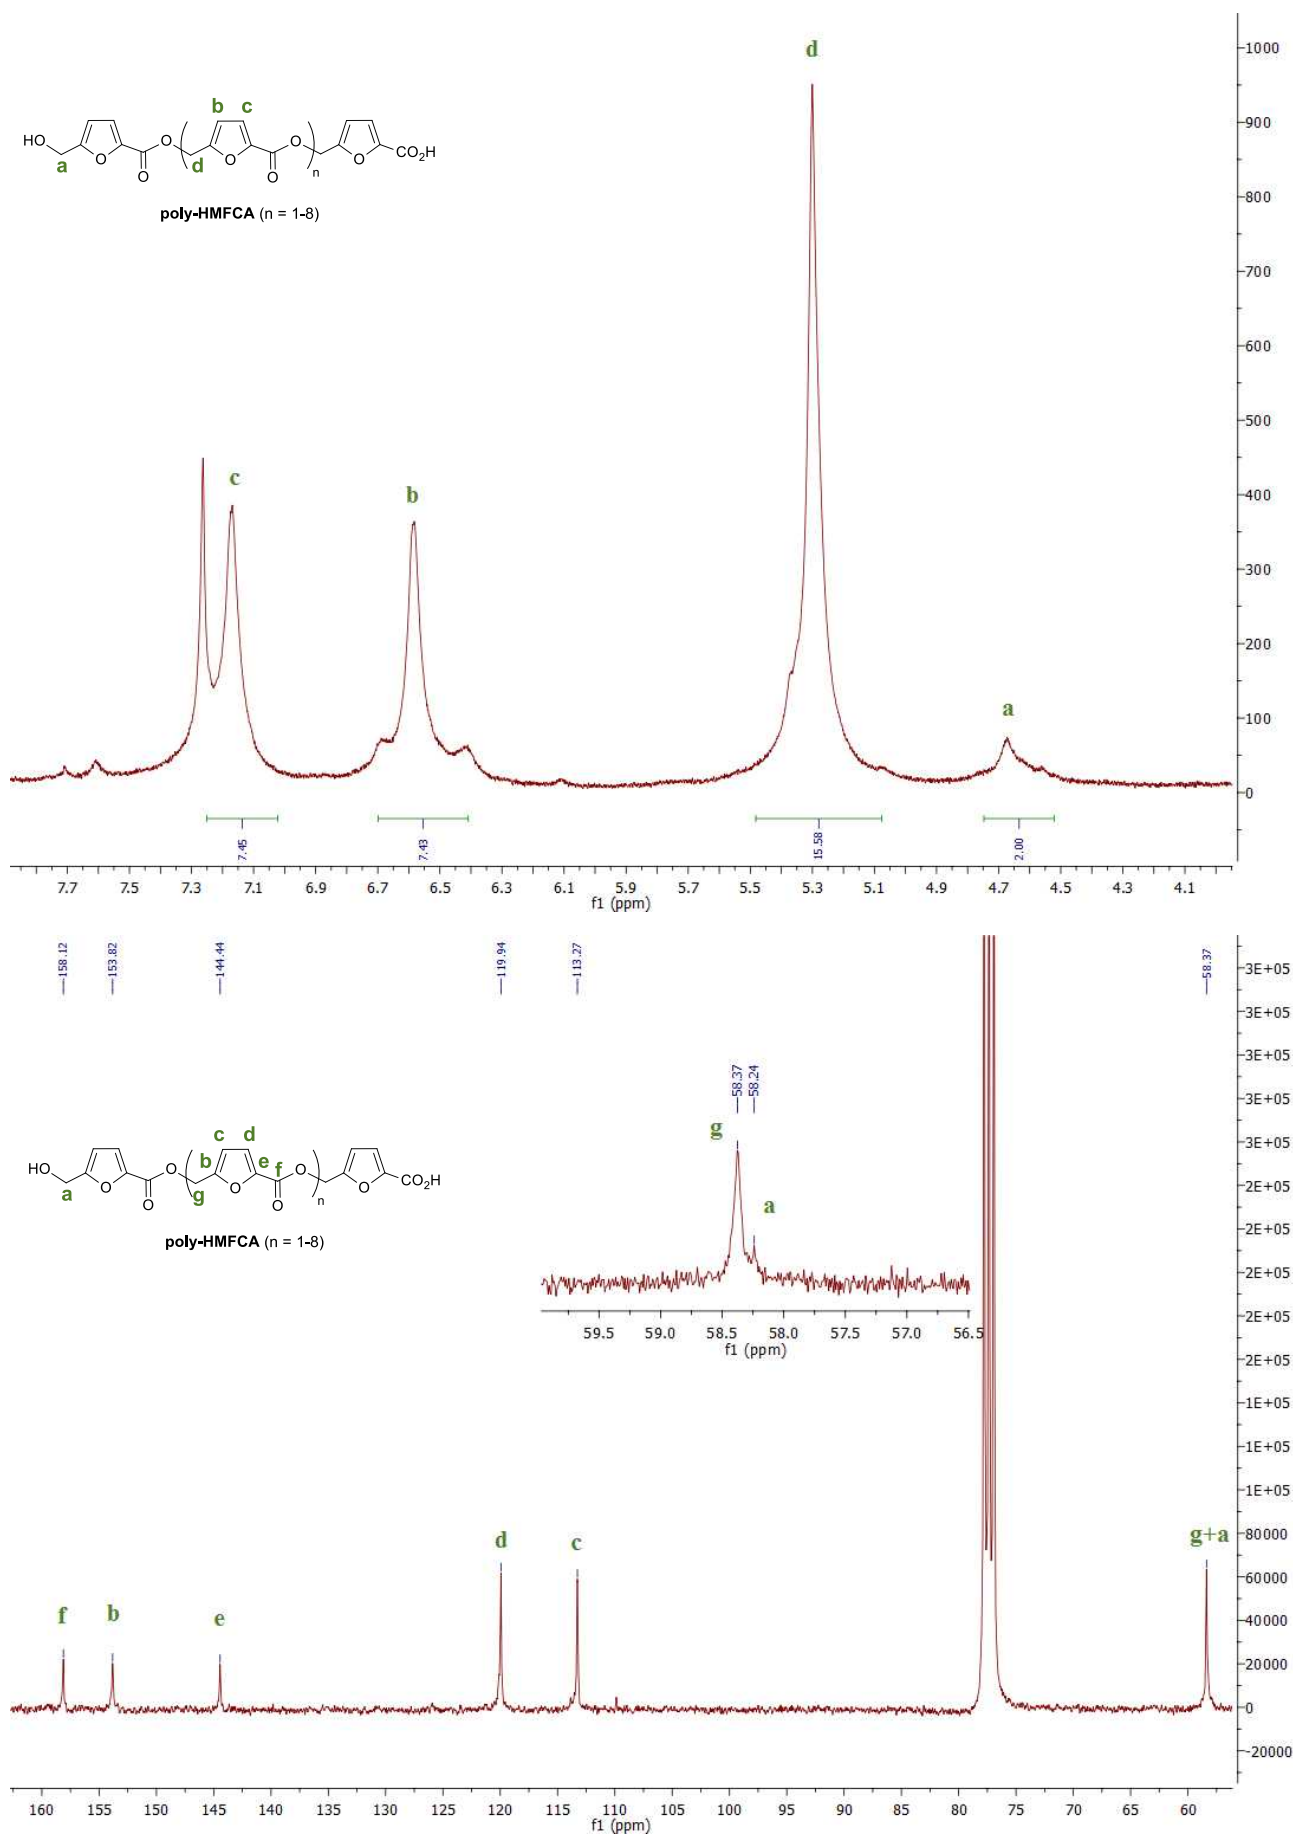

**$^1\text{H}$  (300 MHz) and  $^{13}\text{C}$  (101 MHz) spectra (acetone- $d_6$ ) of HMFCA**

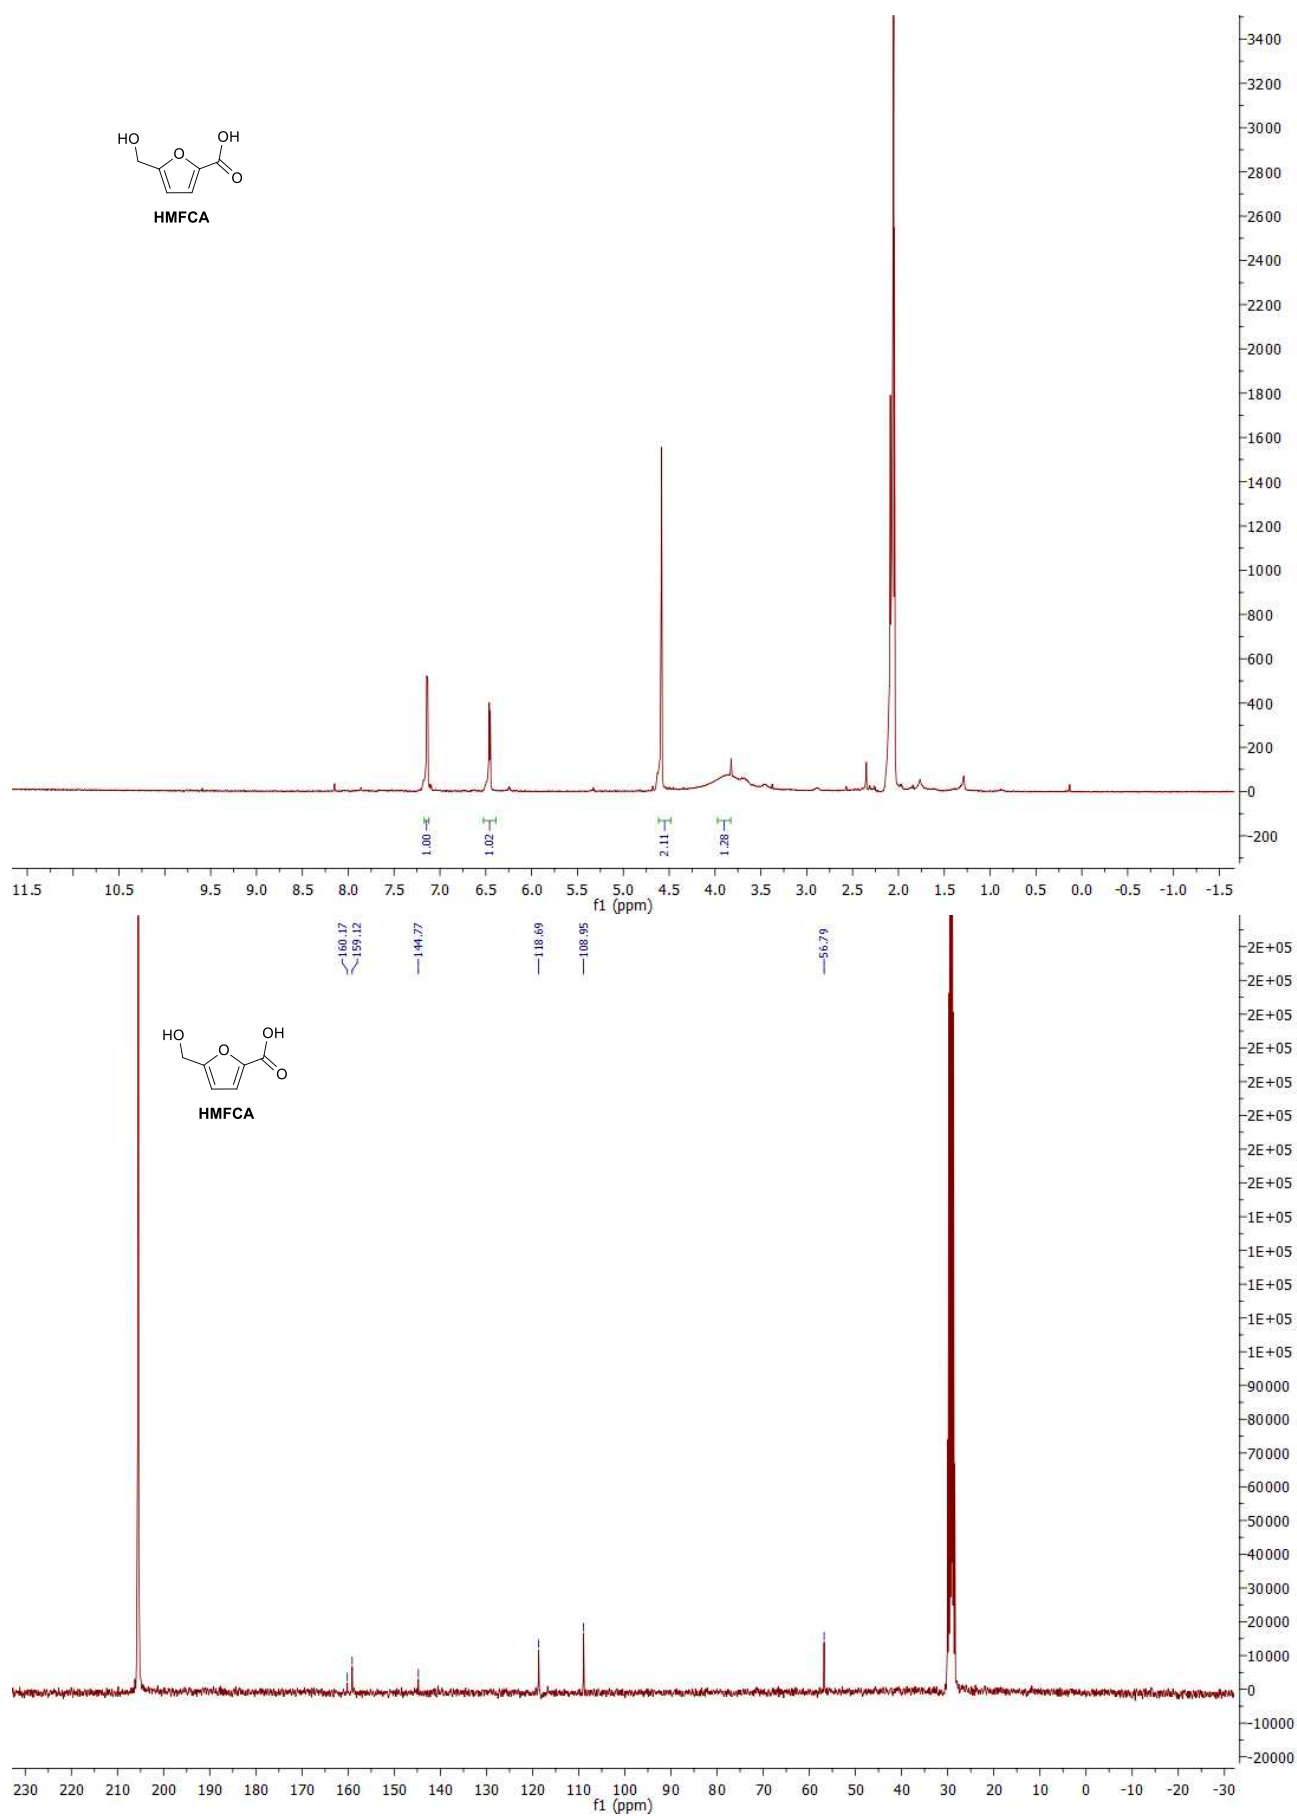

**$^1\text{H}$  (300 MHz) and  $^{13}\text{C}$  (101 MHz) spectra ( $\text{CDCl}_3$ ) of 4**

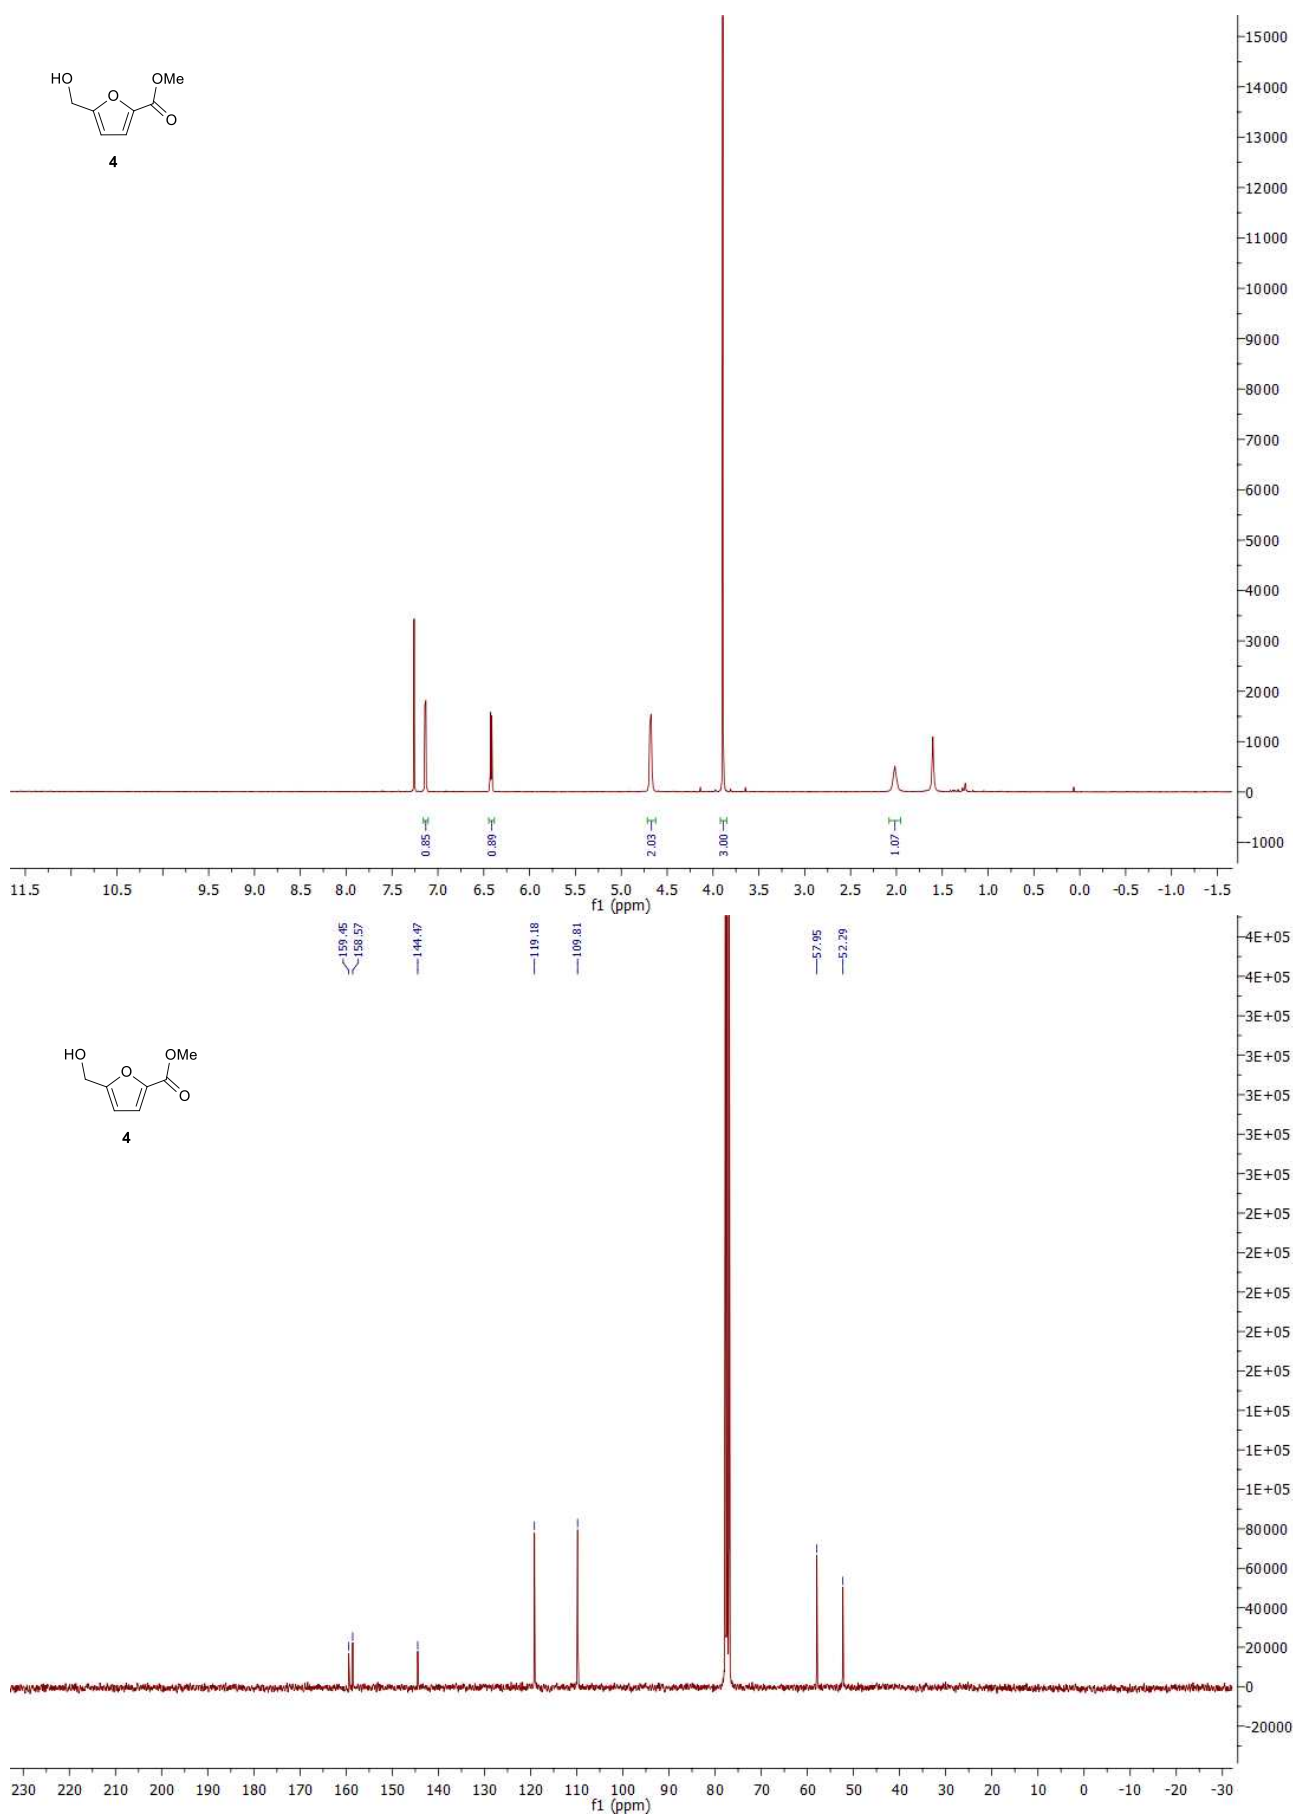

**$^1\text{H}$  (300 MHz) and  $^{13}\text{C}$  (101 MHz) spectra ( $\text{CDCl}_3$ ) of **5****

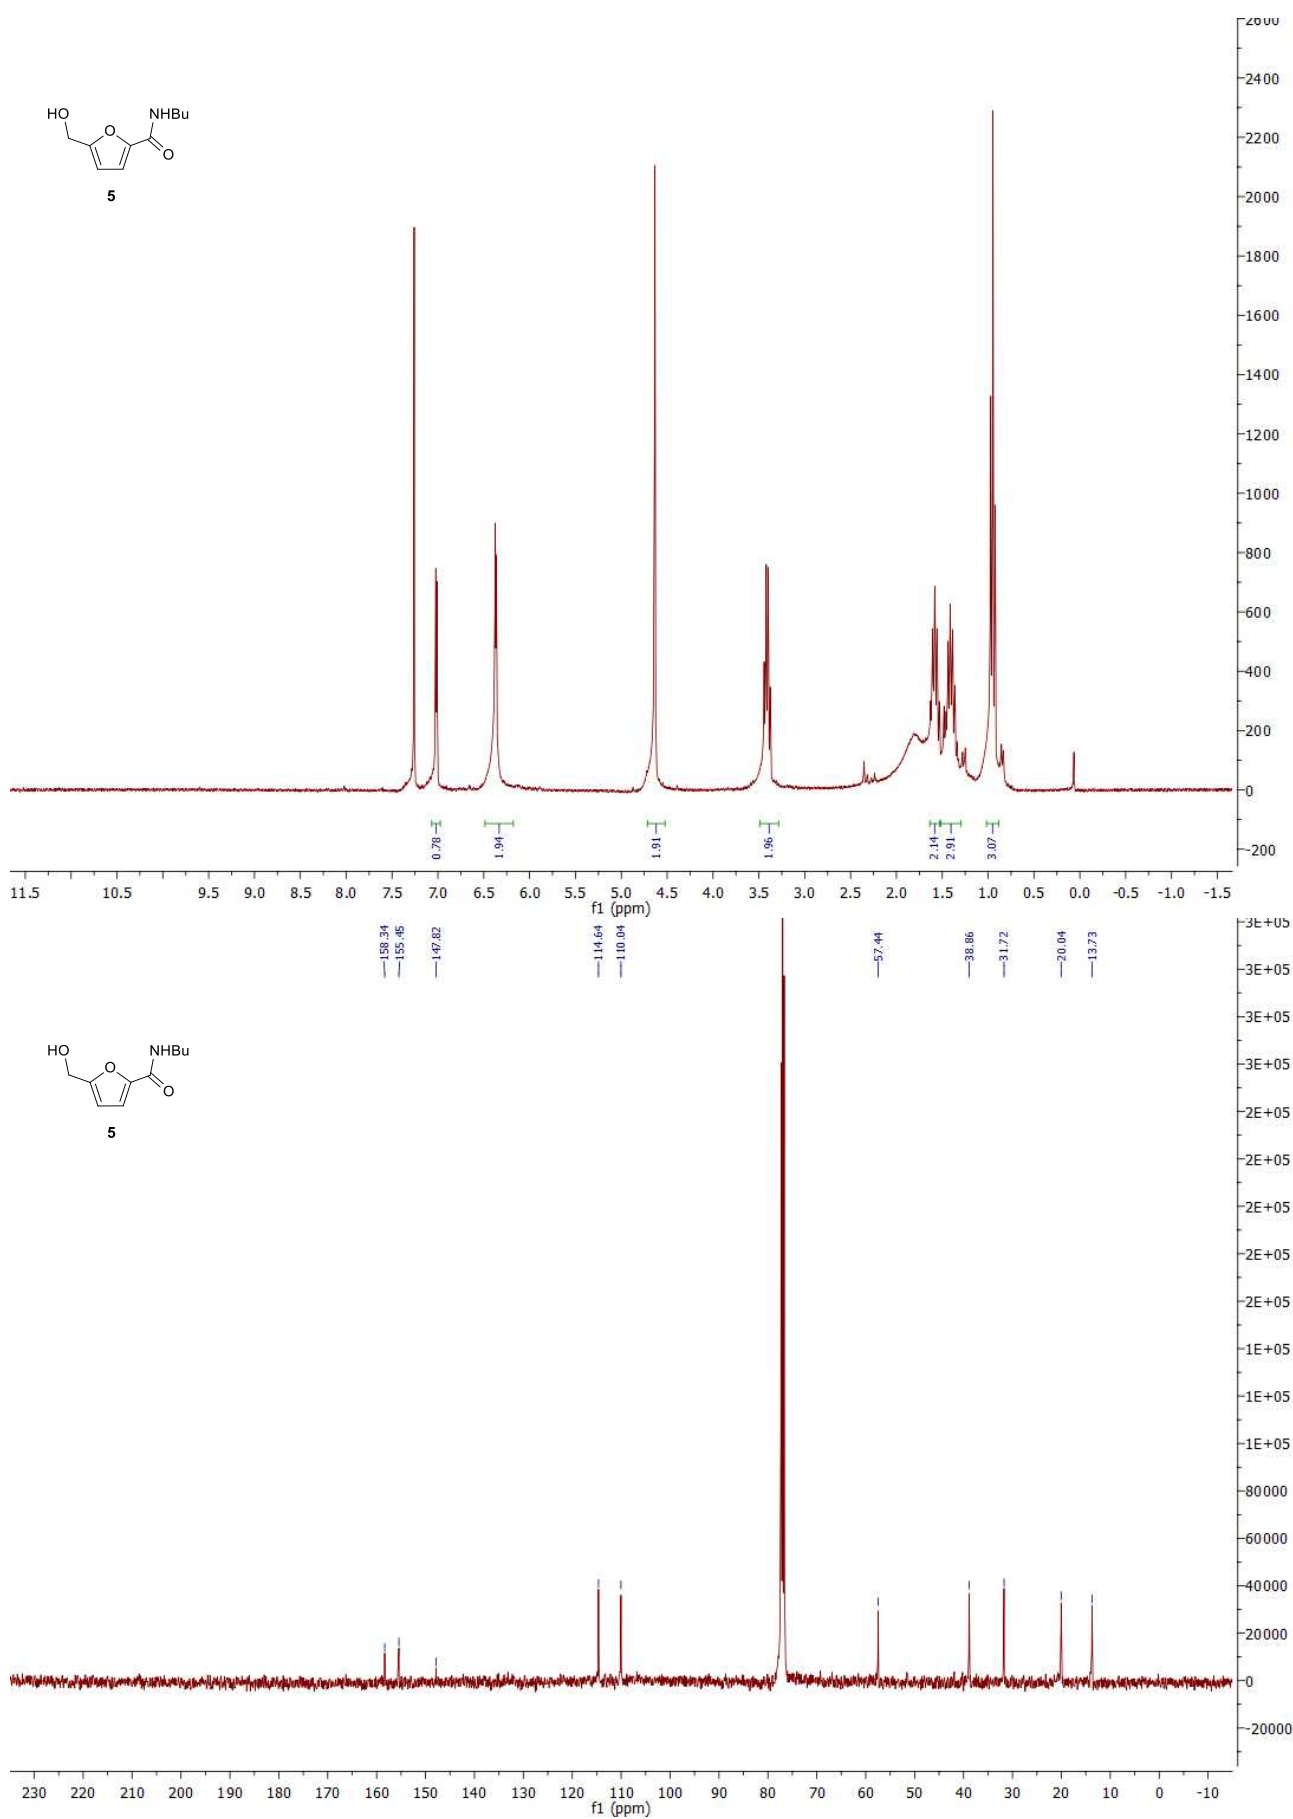

**$^1\text{H}$  (300 MHz) and  $^{13}\text{C}$  (101 MHz) spectra ( $\text{CDCl}_3$ ) of 6**

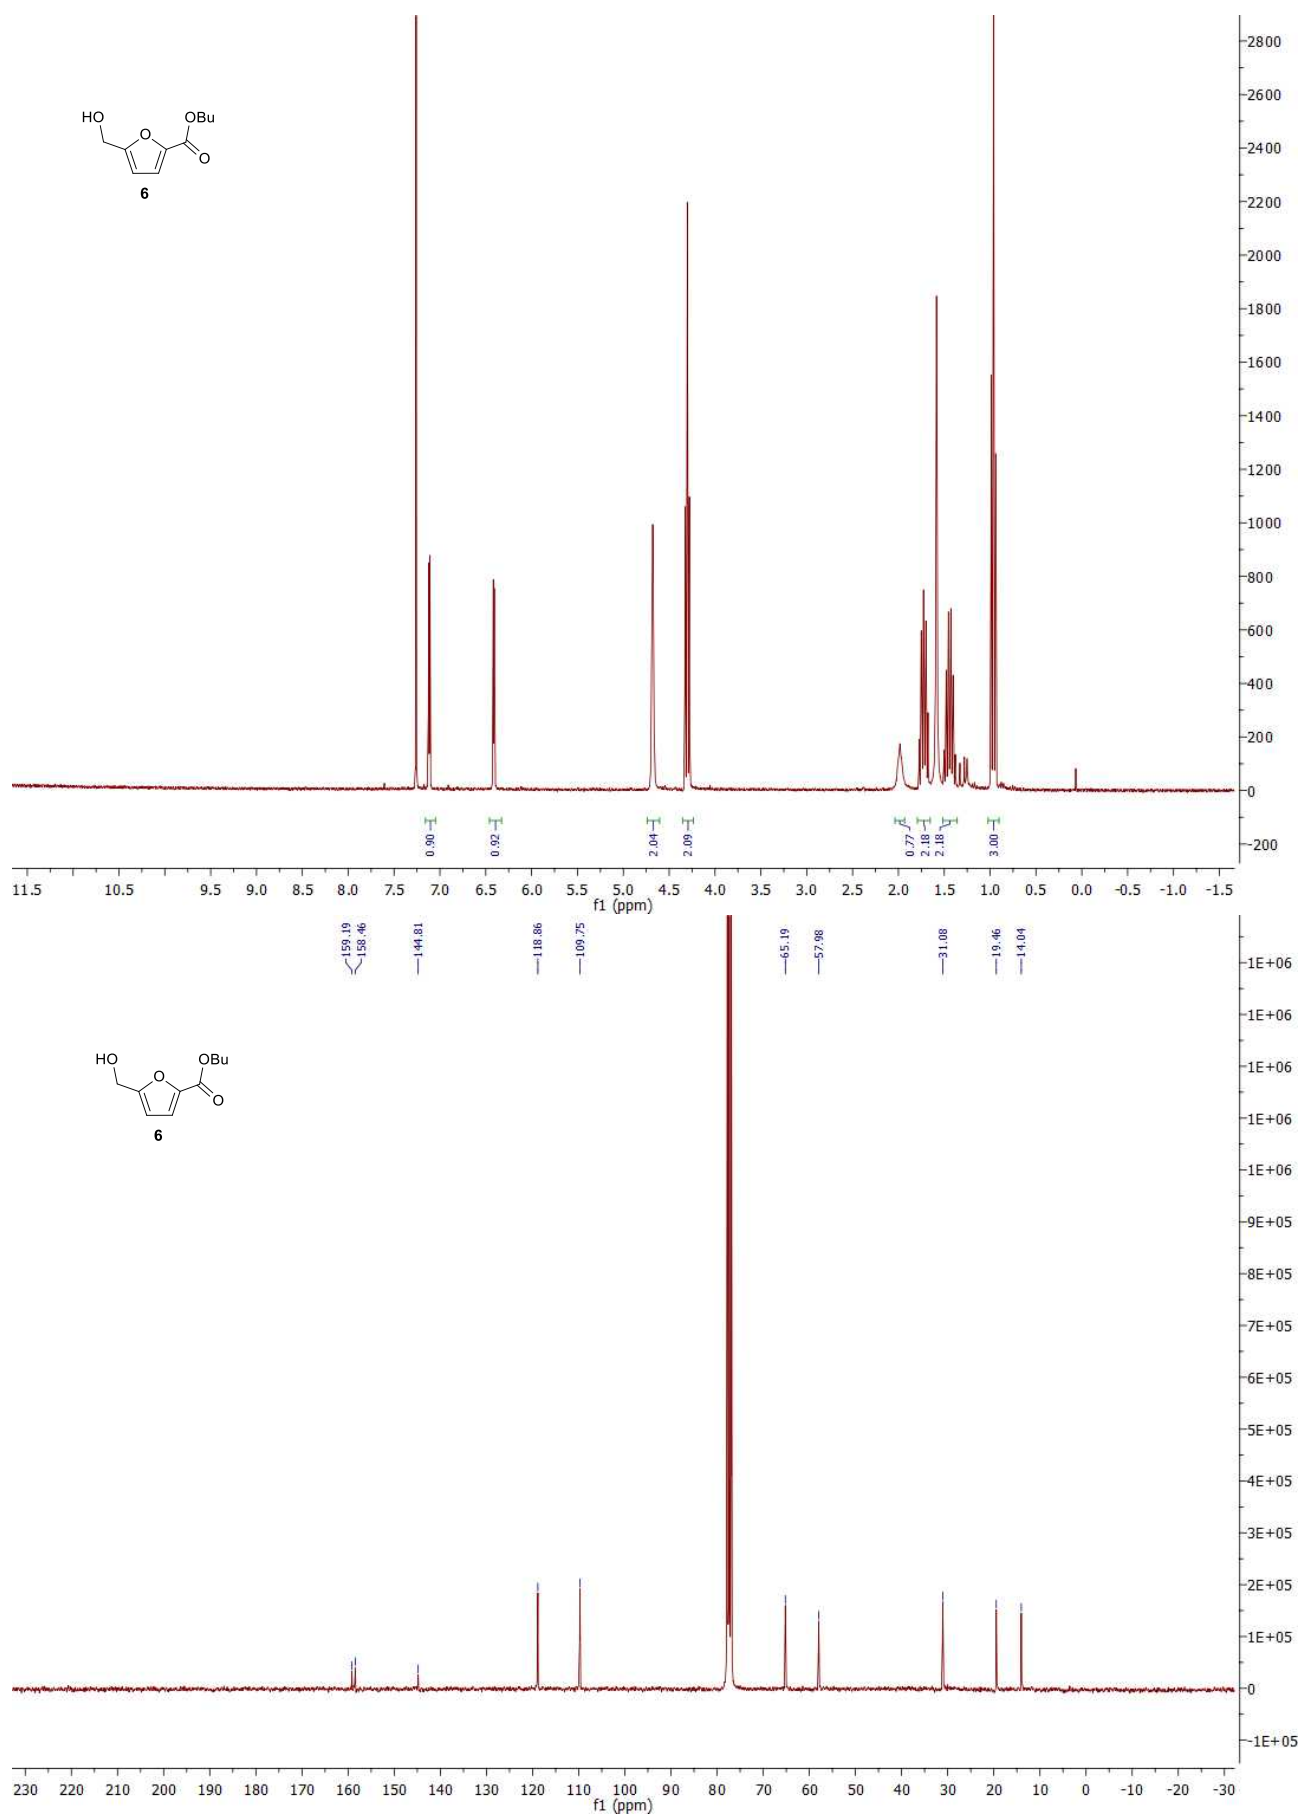



**$^1\text{H}$  (300 MHz) and  $^{13}\text{C}$  (101 MHz) spectra ( $\text{CDCl}_3$ ) of 7**

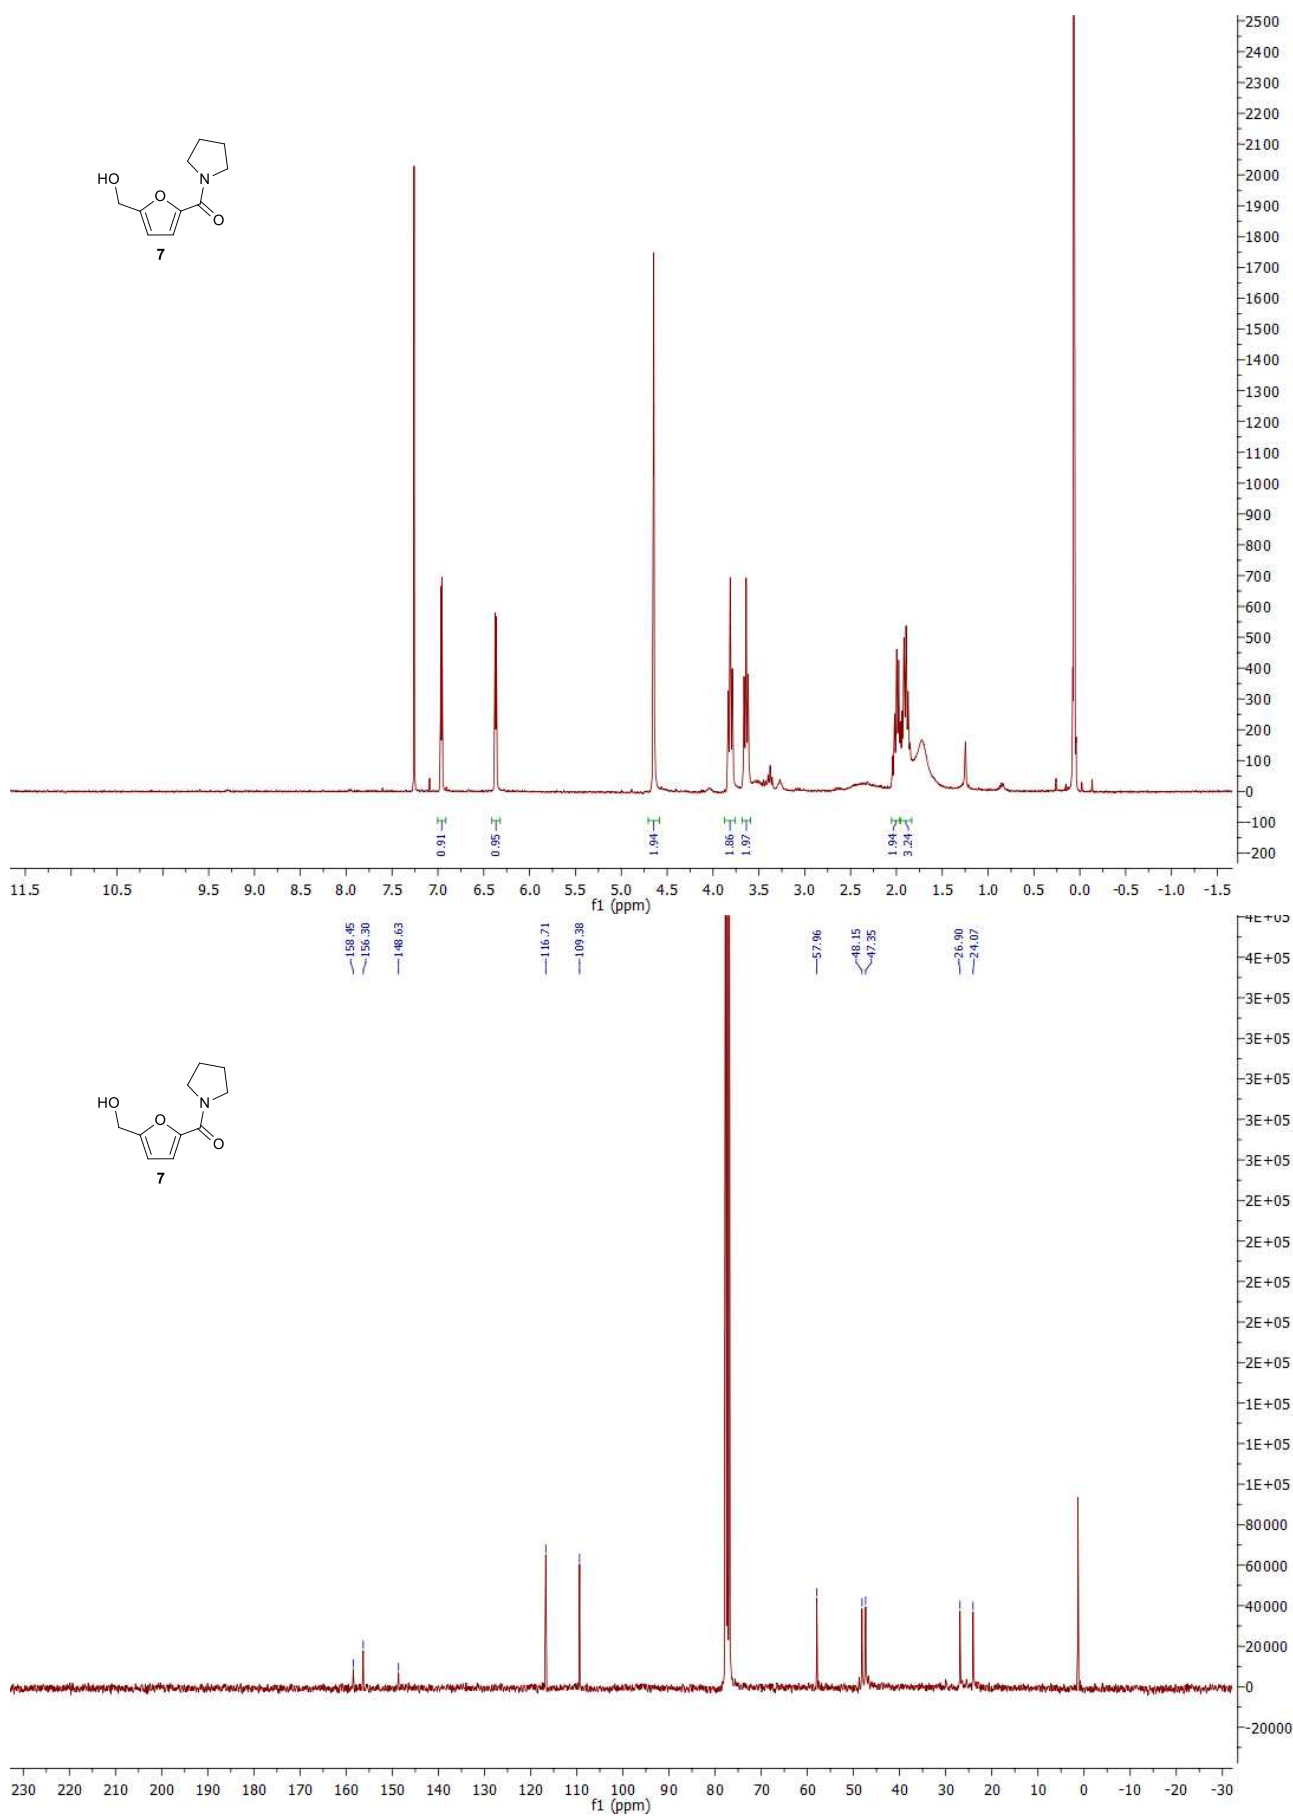

**$^1\text{H}$  (300 MHz) and  $^{13}\text{C}$  (101 MHz) spectra ( $\text{CDCl}_3$ ) of 8**

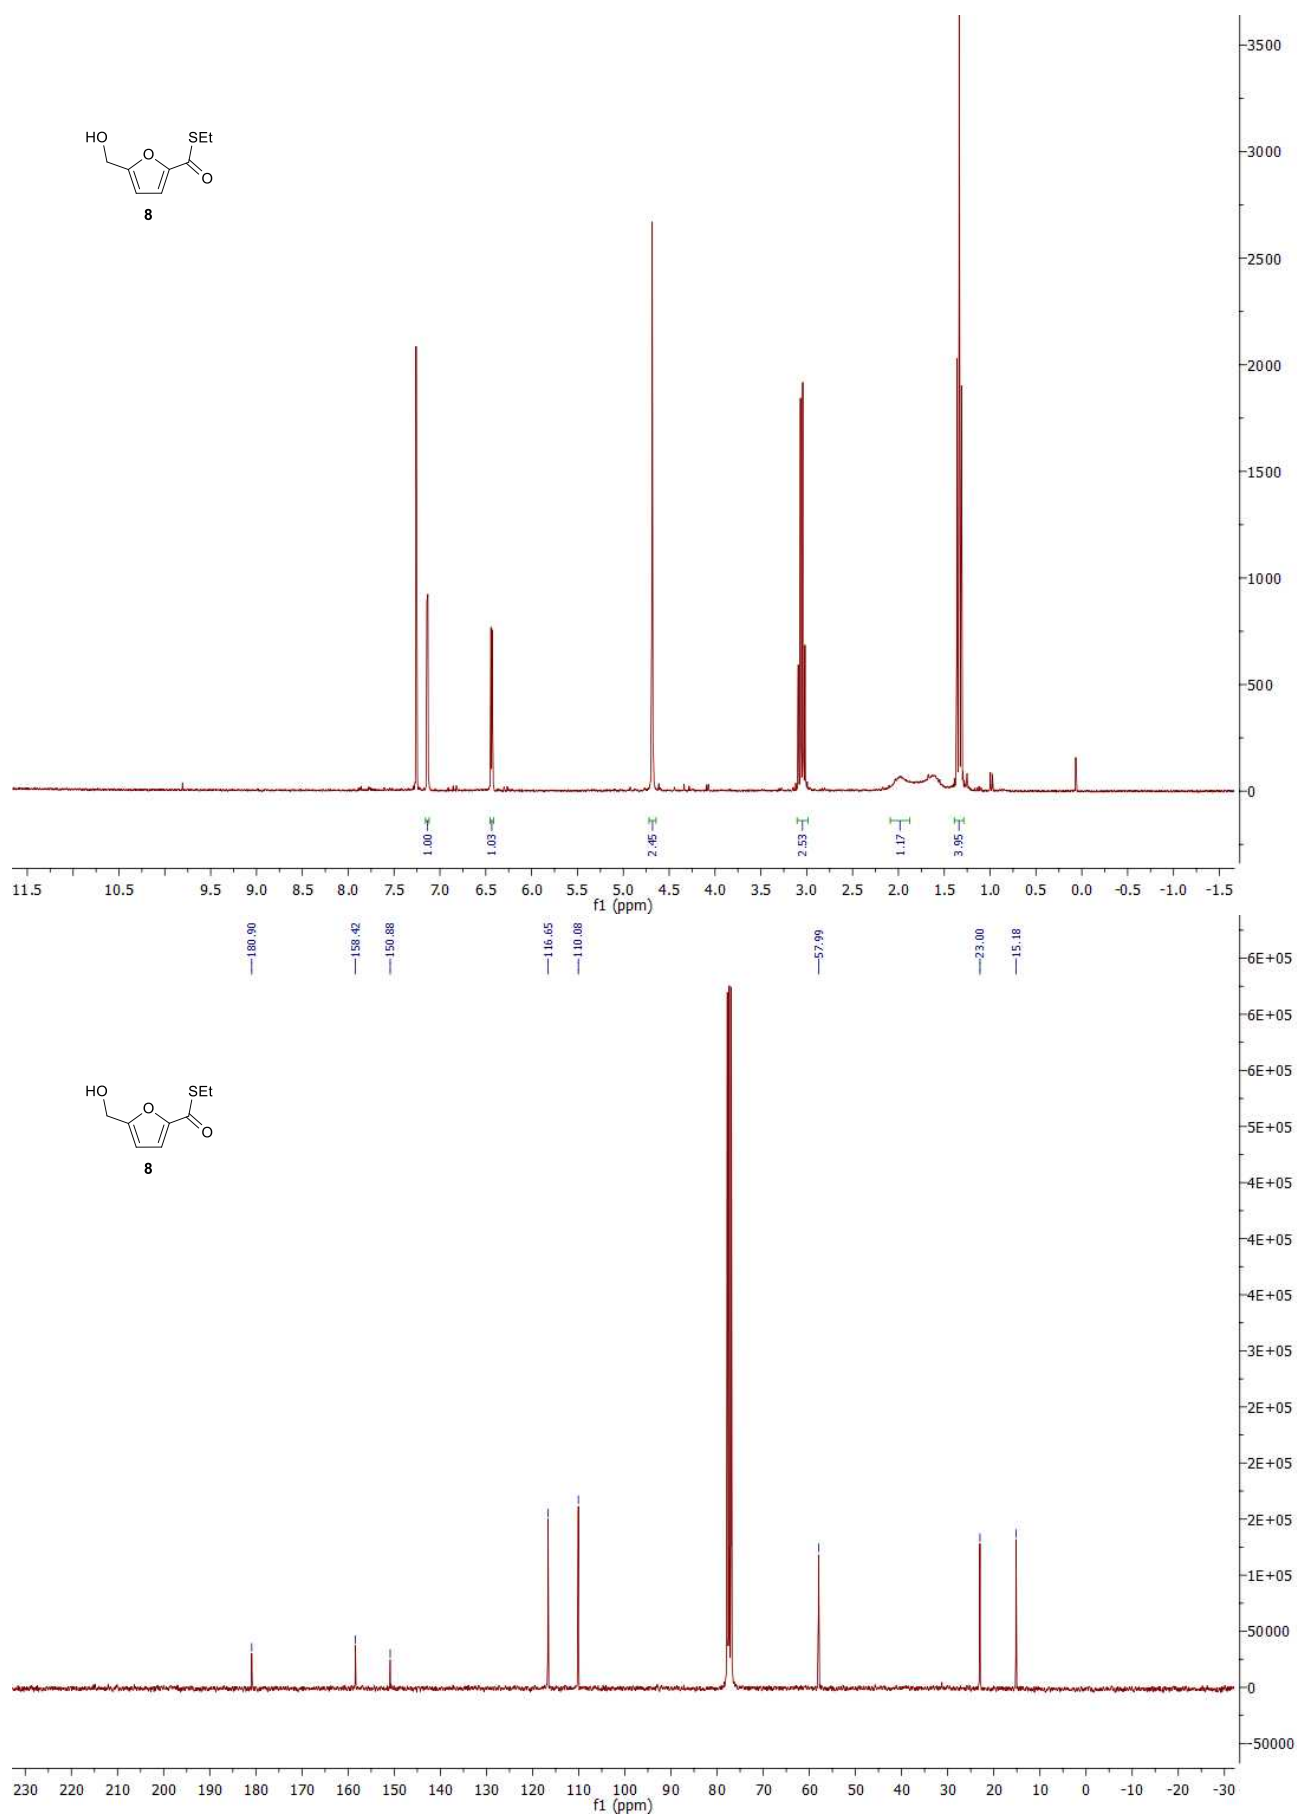

**$^1\text{H}$  (300 MHz) and  $^{13}\text{C}$  (101 MHz) spectra ( $\text{CDCl}_3$ ) of **9****

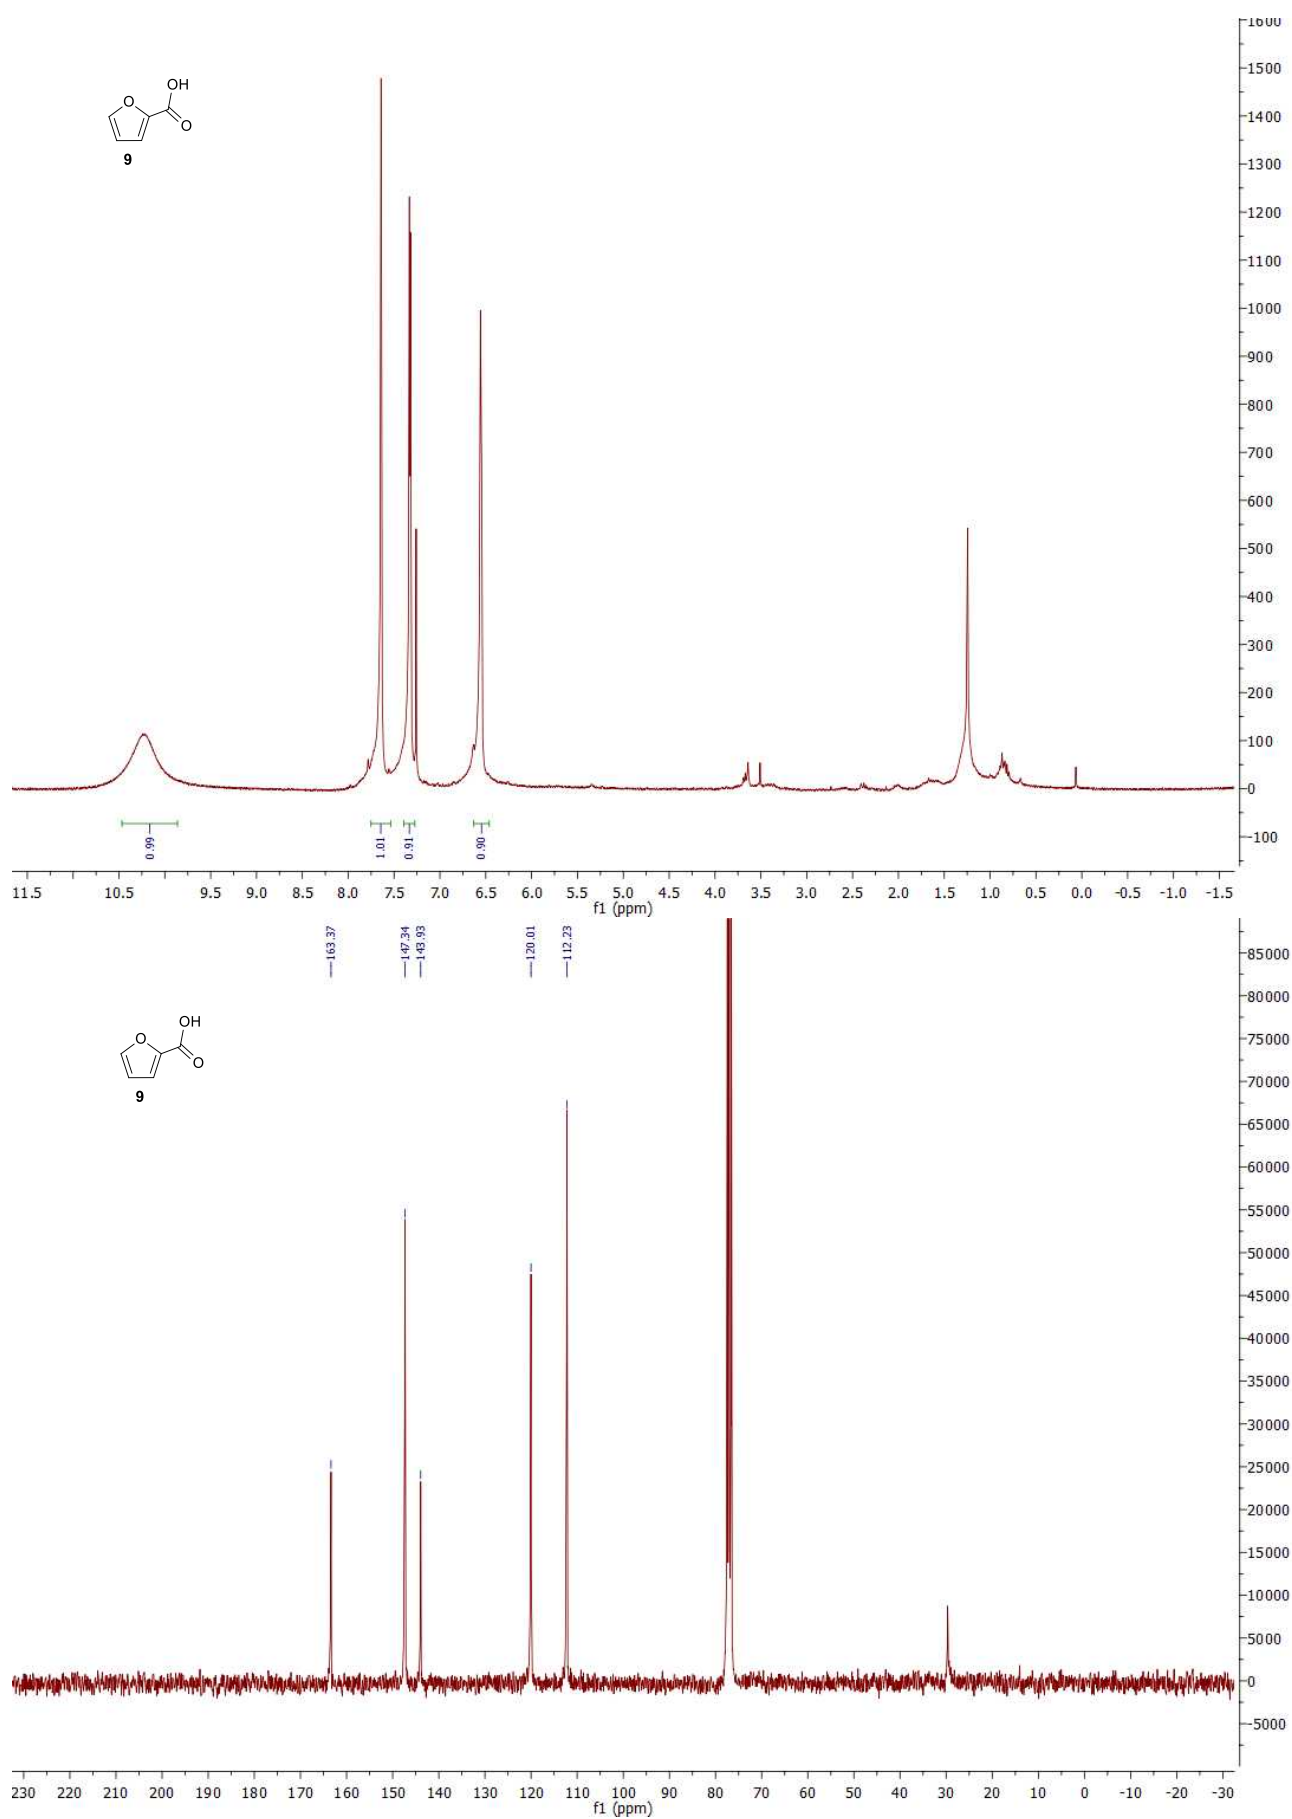

**10**

<sup>1</sup>H NMR spectrum (400 MHz, CDCl<sub>3</sub>) of compound **10**. The spectrum shows peaks at approximately 7.2 ppm (0.80), 7.1 ppm (0.79), 6.5 ppm (0.82), 4.3 ppm (2.00), 1.6 ppm (2.05), 1.5 ppm (2.09), and 1.1 ppm (2.98).

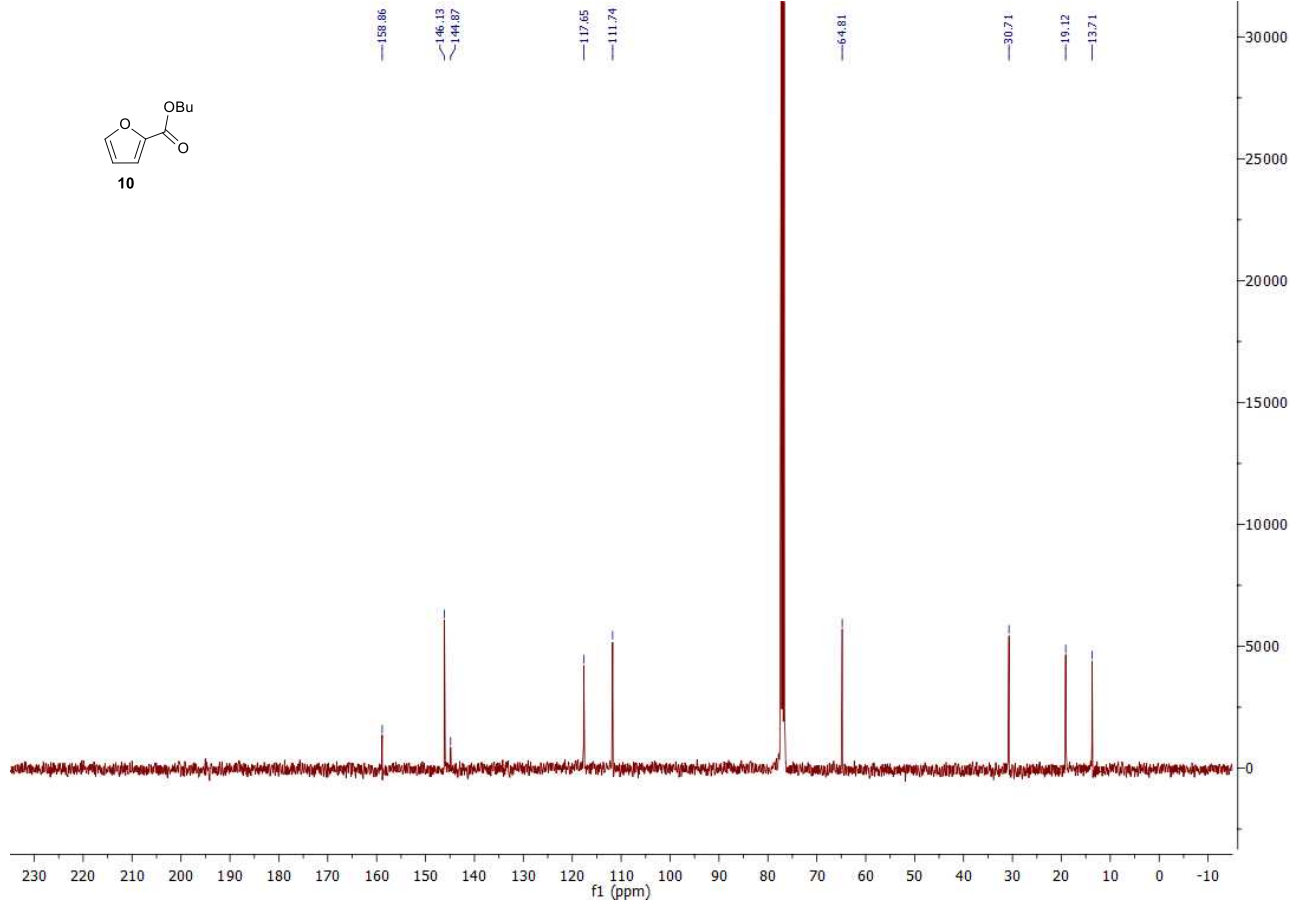

**$^1\text{H}$  (300 MHz) and  $^{13}\text{C}$  (101 MHz) spectra ( $\text{CDCl}_3$ ) of 11**

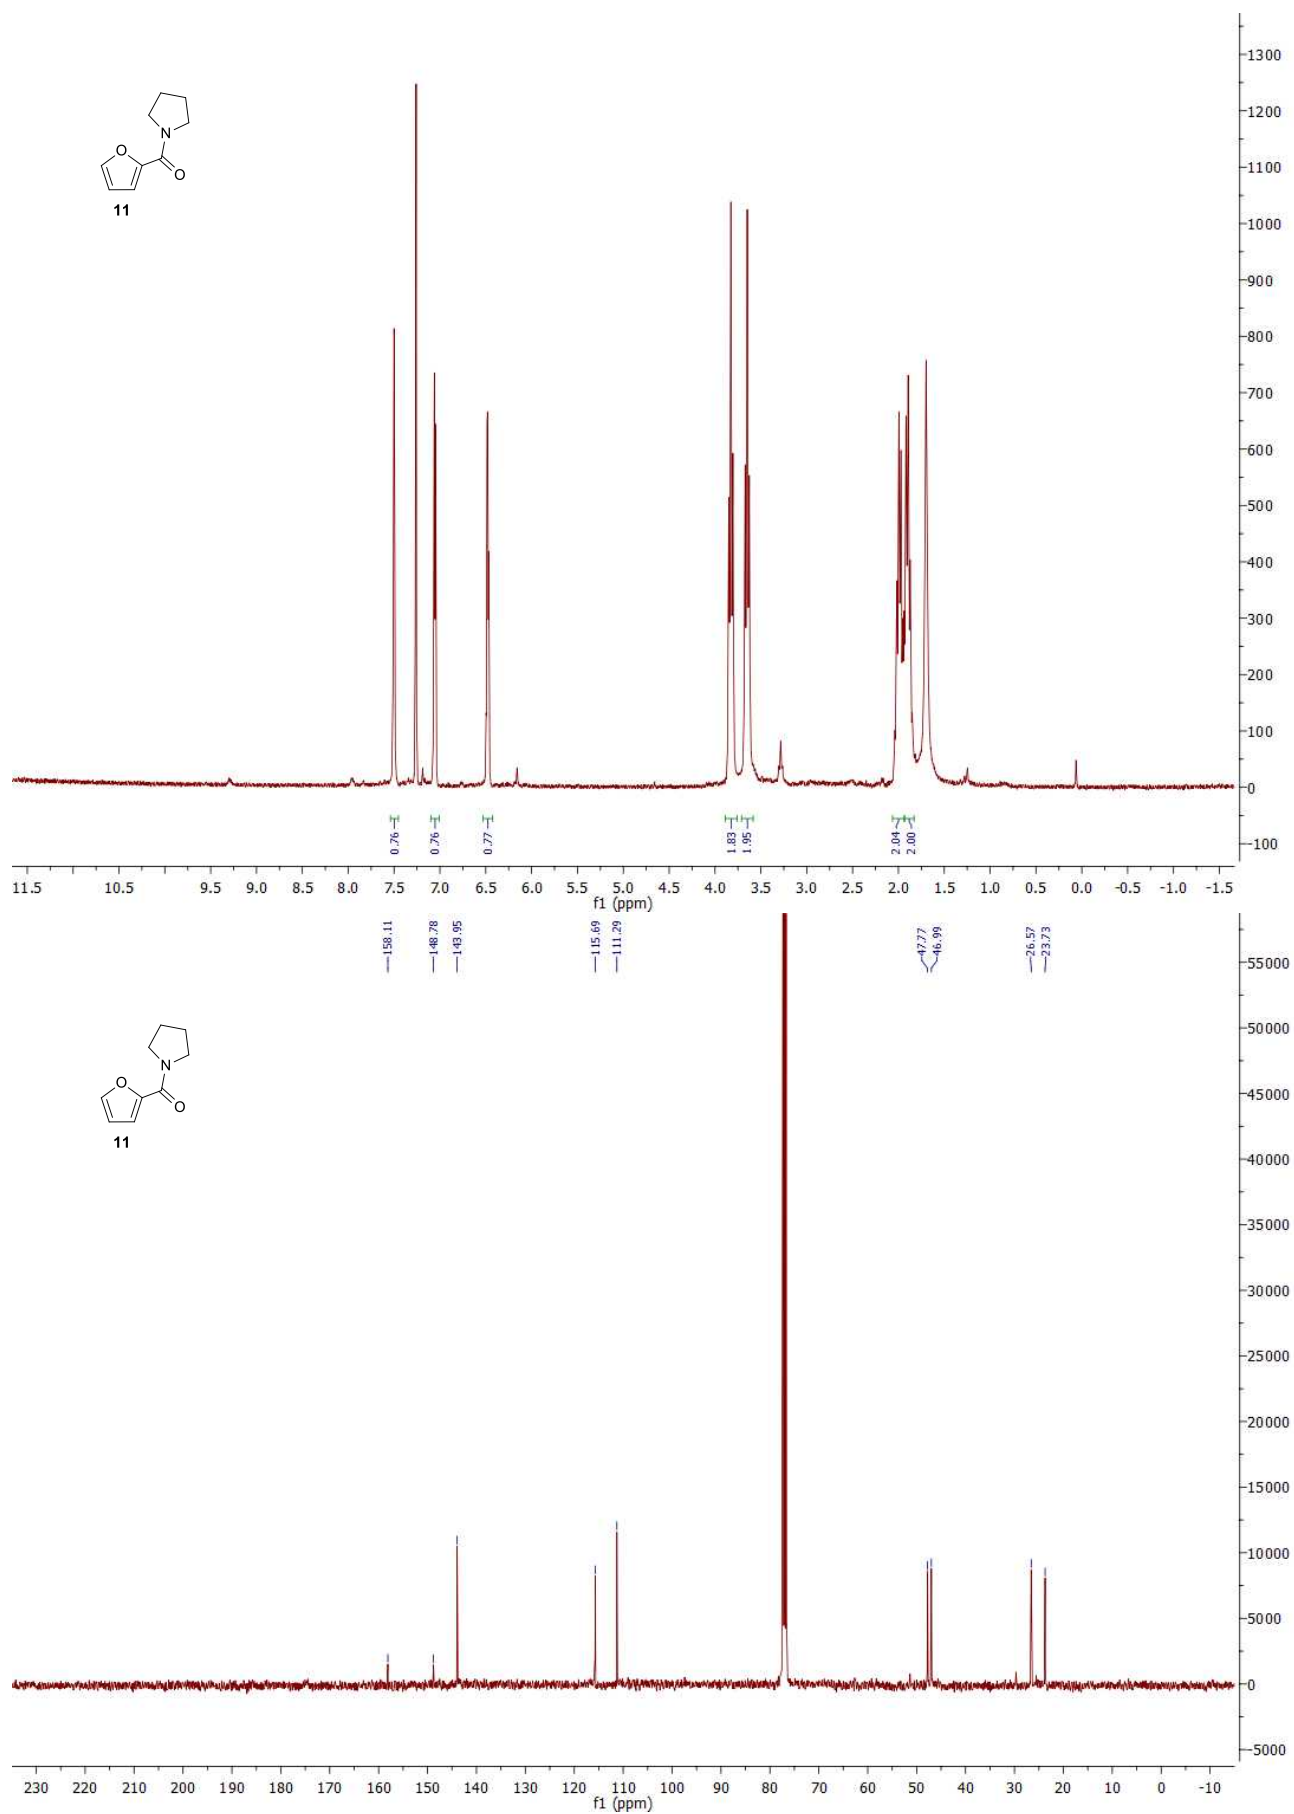

**$^1\text{H}$  (300 MHz) and  $^{13}\text{C}$  (101 MHz) spectra ( $\text{CDCl}_3$ ) of 12**

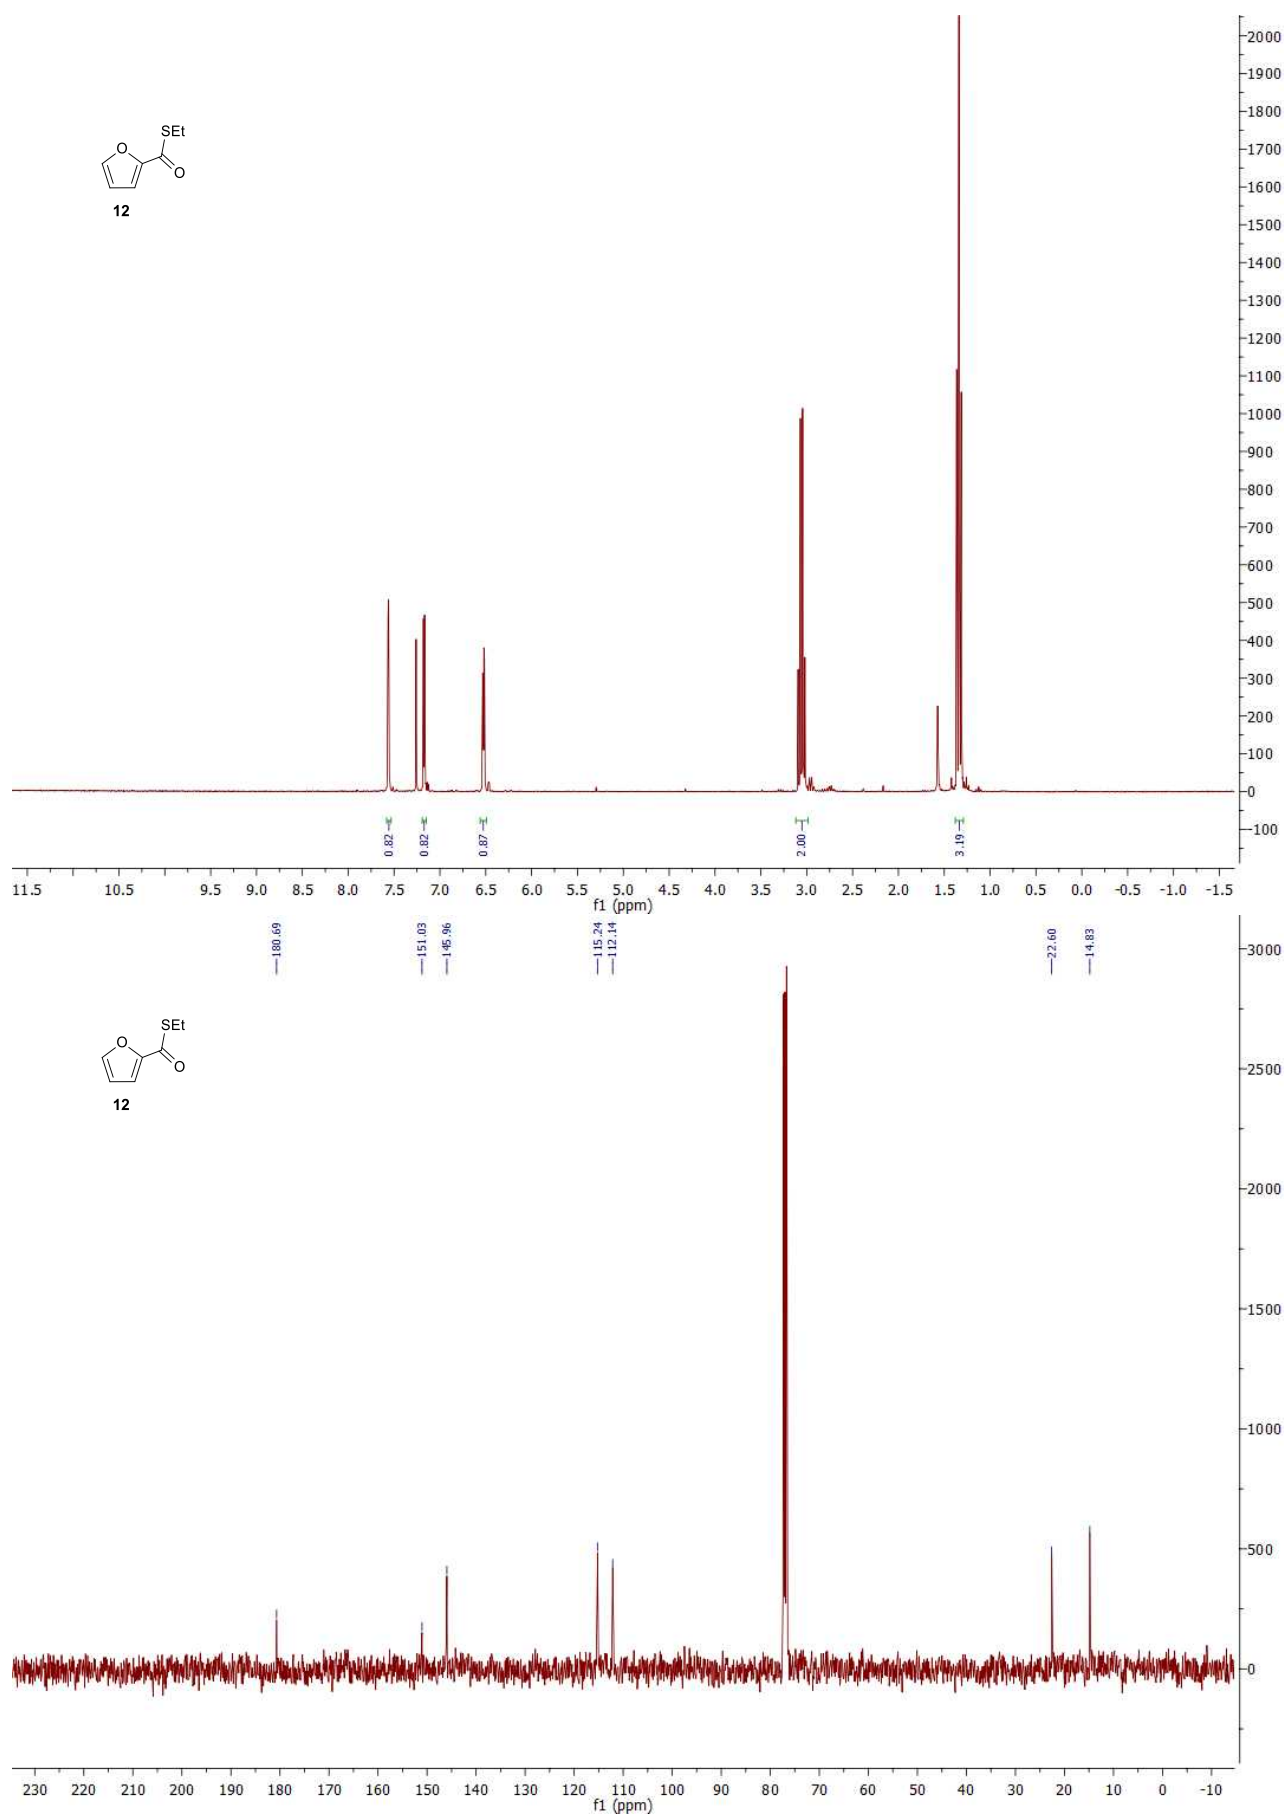

Supplement: c8ob02425a1.pdf [file c8ob02425a1.pdf]
