# Supplementary material for: Aerobic oxidation of 5-hydroxymethylfurfural to 5-hydroxymethyl-2-furancarboxylic acid and its derivatives by heterogeneous NHC-catalysis
Source: Royal Society of Chemistry journal article supplement (doi:10.1039/c8ob02425a), 2018-01-01
Supplement: c8ob02425a2.pdf [file c8ob02425a2.pdf]

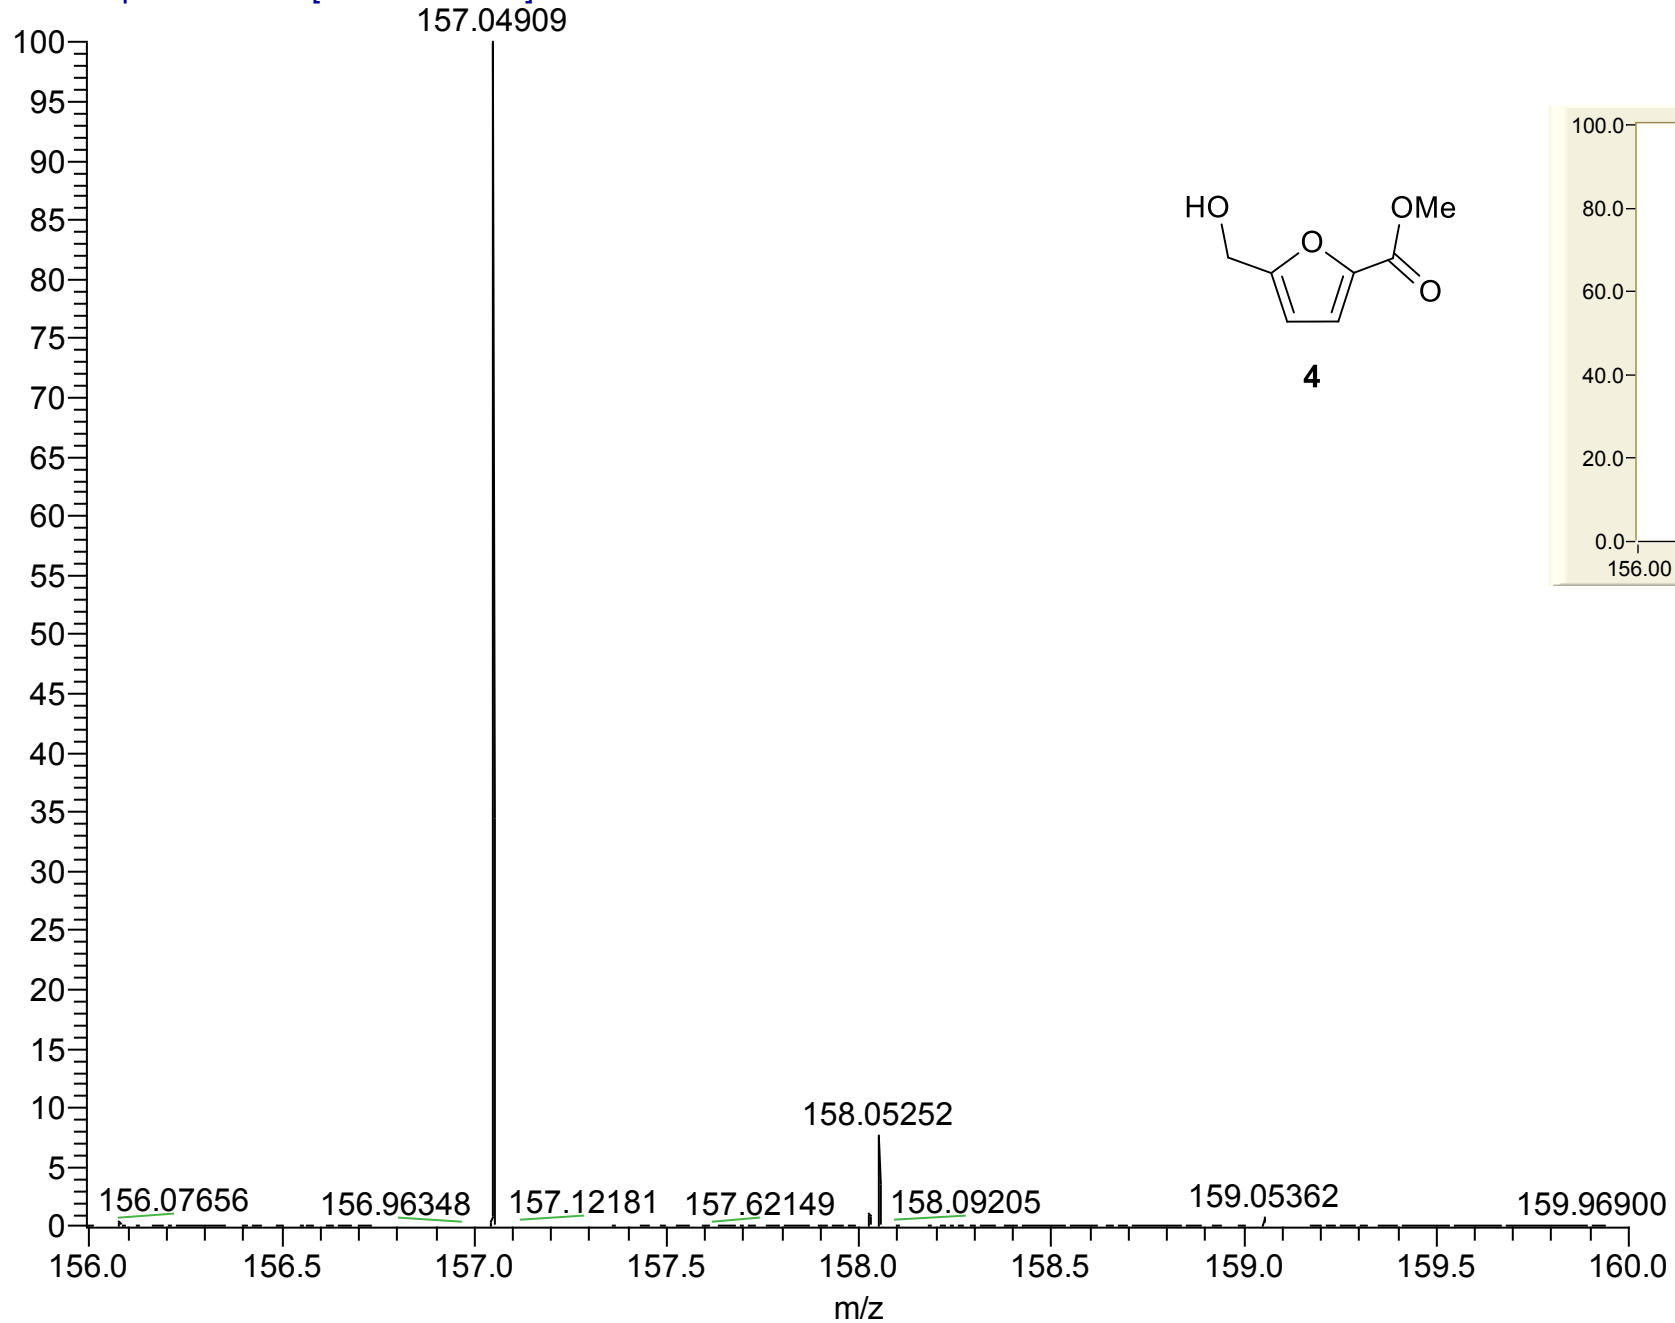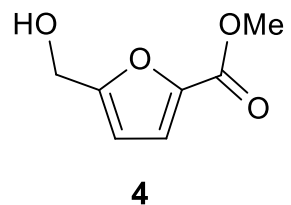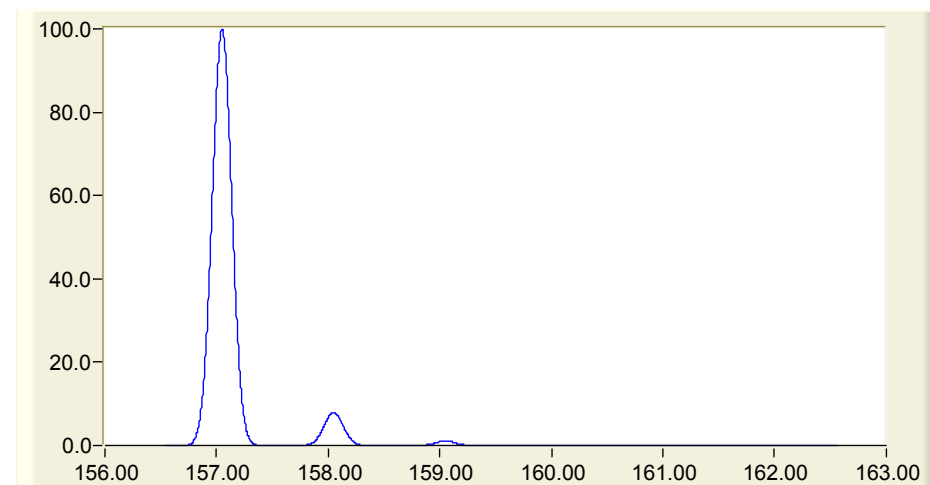

Isotopic Abundances for C<sub>7</sub>H<sub>8</sub>O<sub>4</sub>

| Mass/Charge | Fraction  | Intensity |
|-------------|-----------|-----------|
| 157.04954   | 0.9173779 | 100.00    |
| 158.04954   | 0.0719536 | 7.84      |
| 159.04954   | 0.0099881 | 1.09      |
| 160.04954   | 0.0006357 | 0.07      |
| 161.04954   | 0.0000433 | 0.00      |
| 162.04954   | 0.0000022 | 0.00      |

T: FTMS + p ESI Full ms [50.00-500.00]

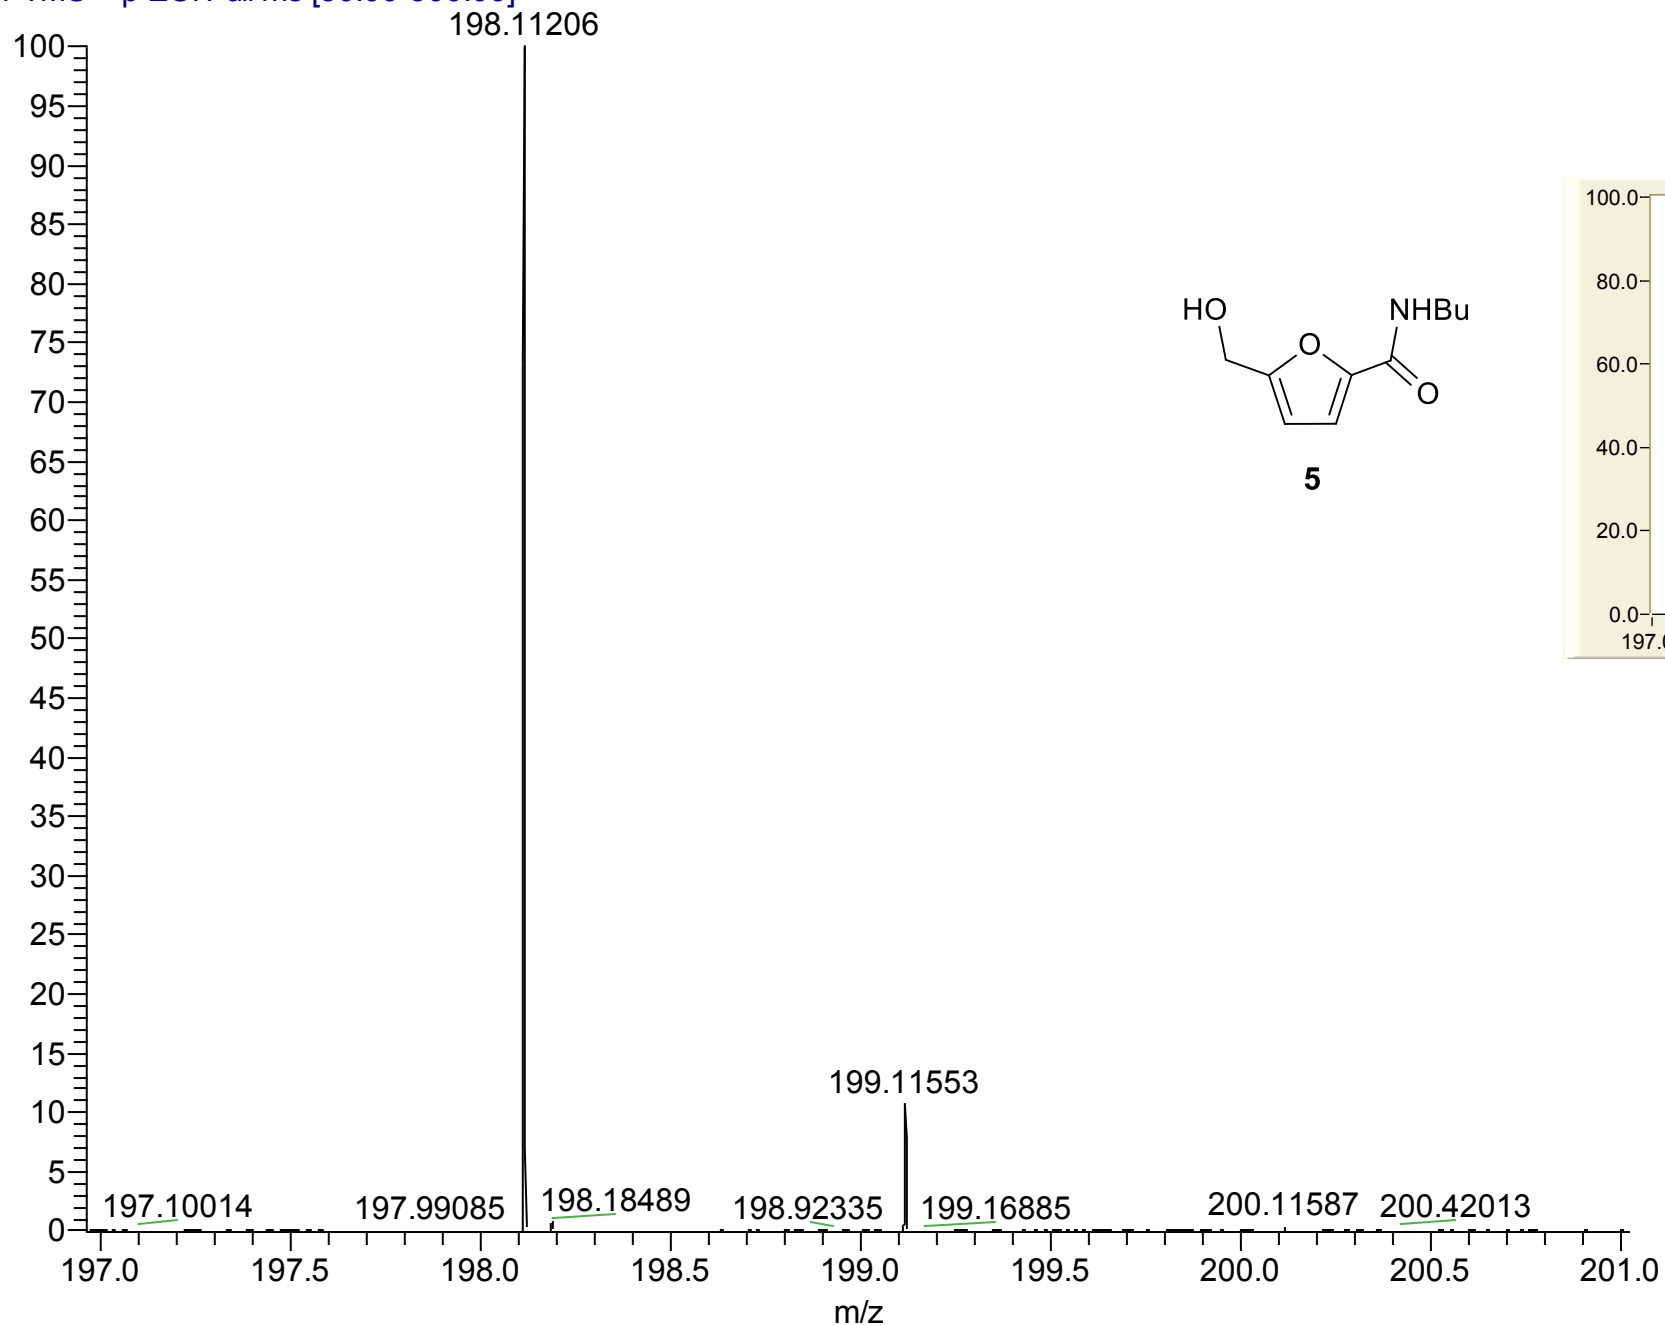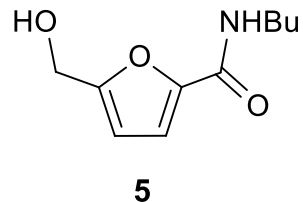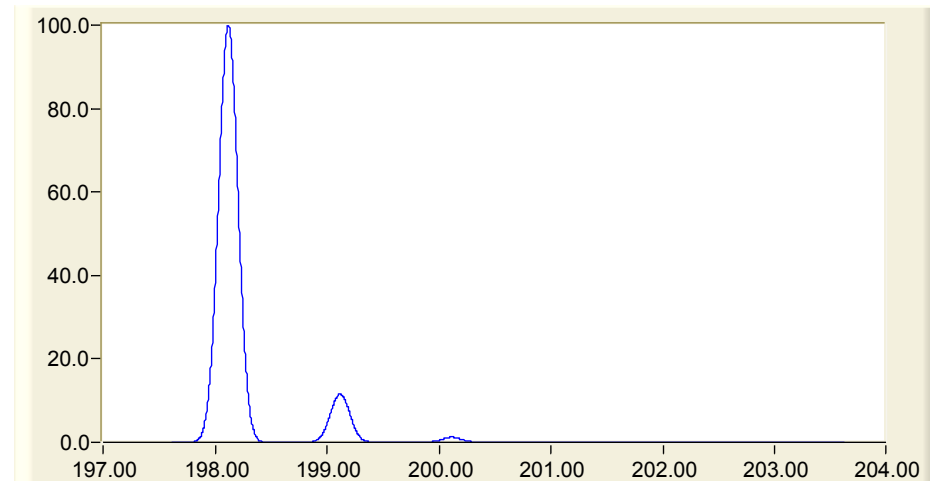

Isotopic Abundances for C<sub>10</sub>H<sub>15</sub>NO<sub>3</sub>

| Mass/Charge | Fraction  | Intensity |
|-------------|-----------|-----------|
| 198.11247   | 0.8862000 | 100.00    |
| 199.11247   | 0.1021292 | 11.52     |
| 200.11247   | 0.0108260 | 1.22      |
| 201.11247   | 0.0007972 | 0.09      |
| 202.11247   | 0.0000502 | 0.01      |
| 203.11247   | 0.0000024 | 0.00      |

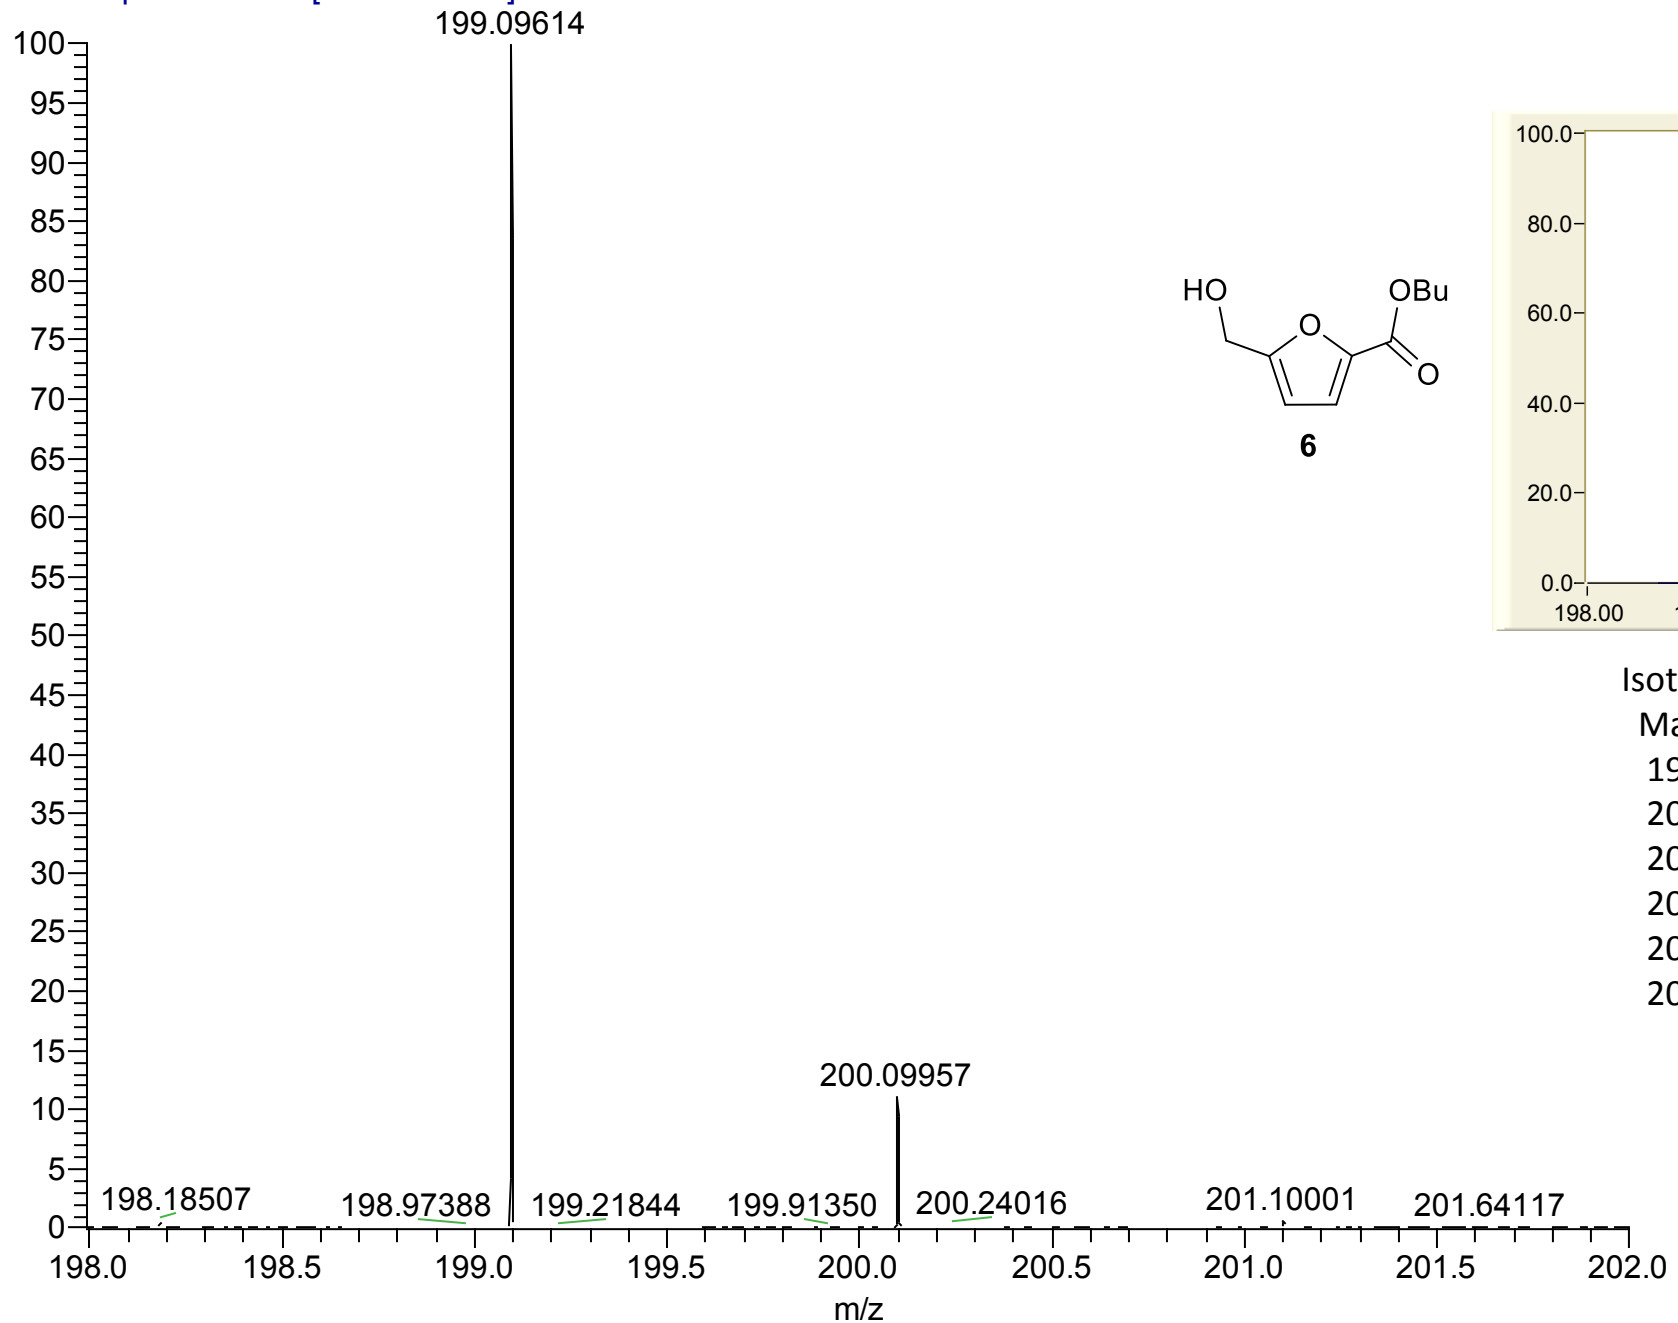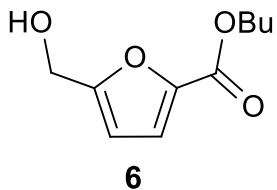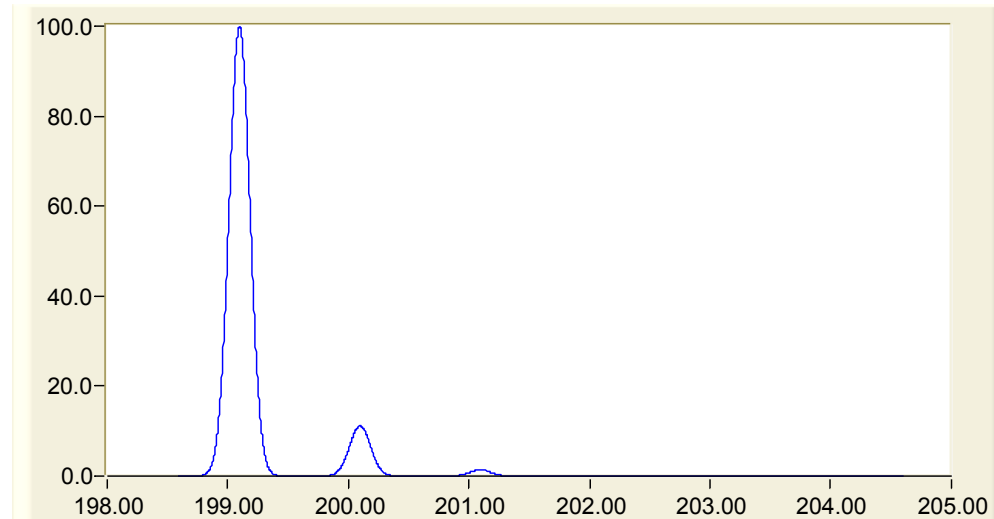

#### Isotopic Abundances for C<sub>10</sub>H<sub>14</sub>O<sub>4</sub>

| Mass/Charge | Fraction  | Intensity |
|-------------|-----------|-----------|
| 199.09648   | 0.8874449 | 100.00    |
| 200.09648   | 0.0991997 | 11.18     |
| 201.09648   | 0.0123222 | 1.39      |
| 202.09648   | 0.0009652 | 0.11      |
| 203.09648   | 0.0000691 | 0.01      |
| 204.09648   | 0.0000037 | 0.00      |

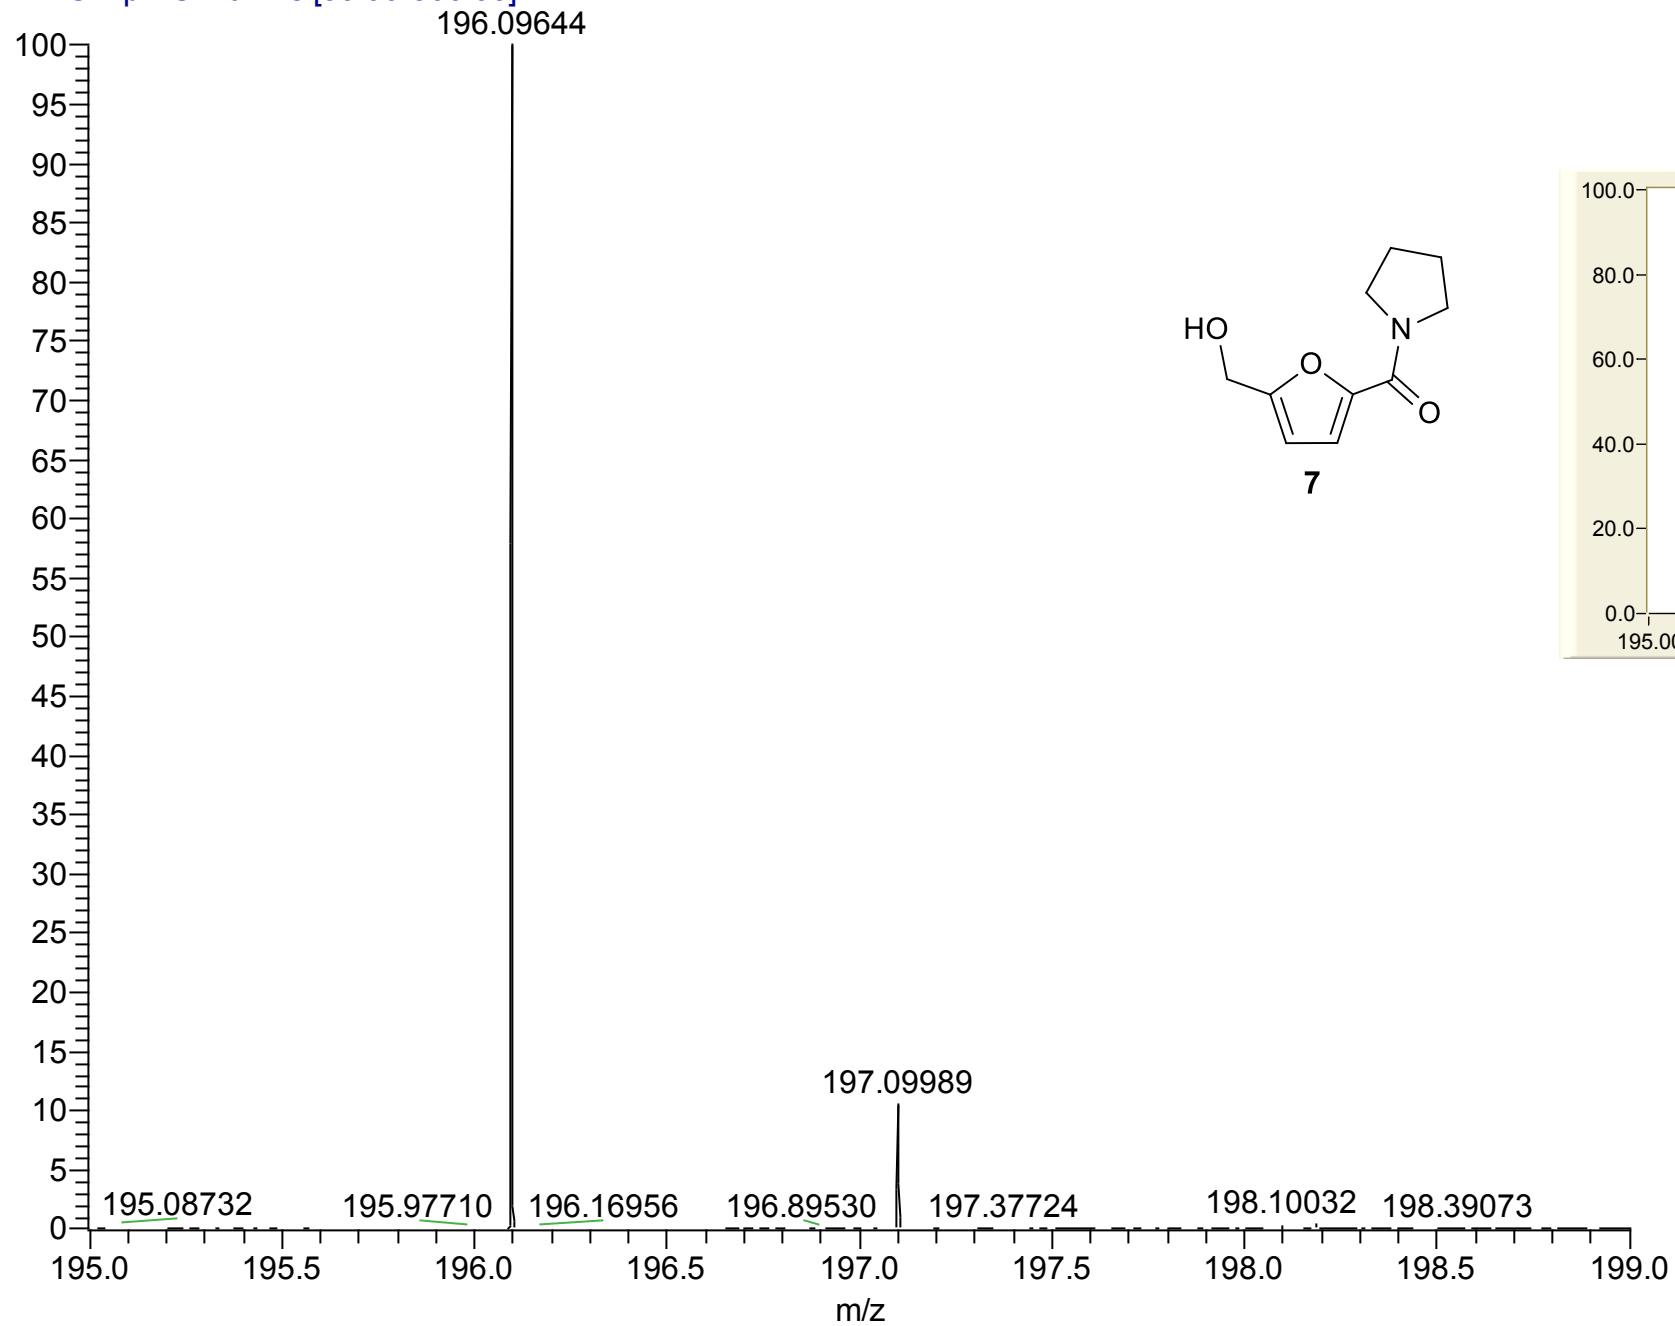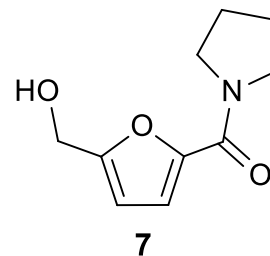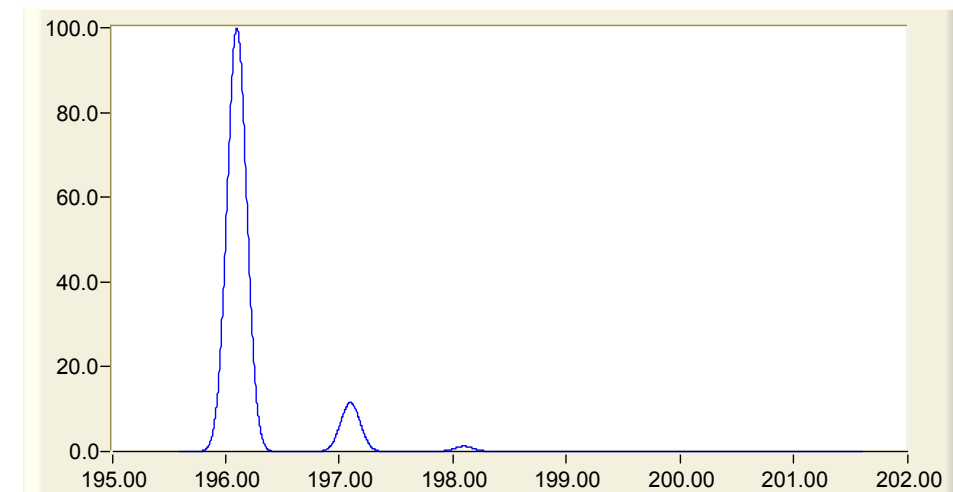

#### Isotopic Abundances for C<sub>10</sub>H<sub>13</sub>NO<sub>3</sub>

| Mass/Charge | Fraction  | Intensity |
|-------------|-----------|-----------|
| 196.09682   | 0.8864658 | 100.00    |
| 197.09682   | 0.1018939 | 11.49     |
| 198.09682   | 0.0107982 | 1.22      |
| 199.09682   | 0.0007941 | 0.09      |
| 200.09682   | 0.0000500 | 0.01      |
| 201.09682   | 0.0000023 | 0.00      |

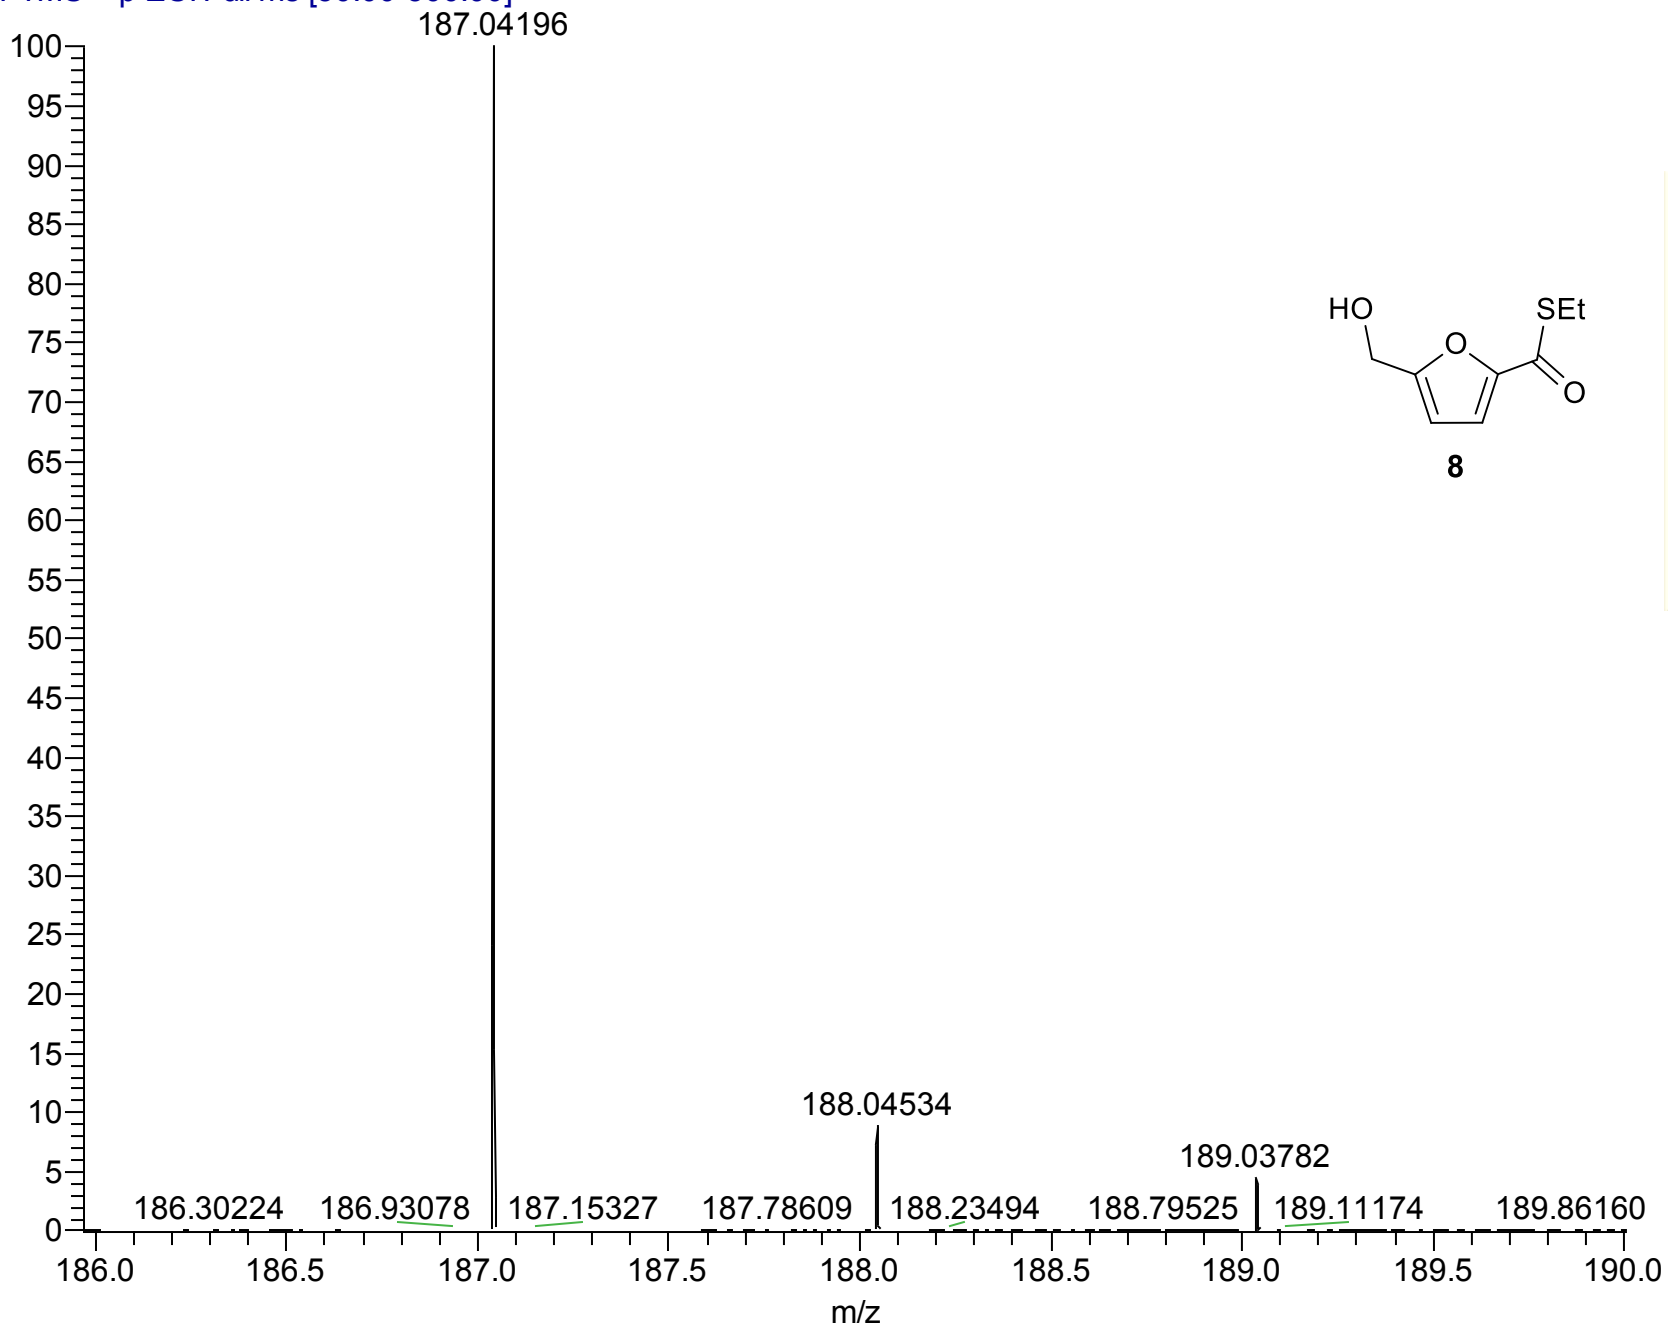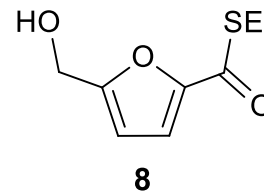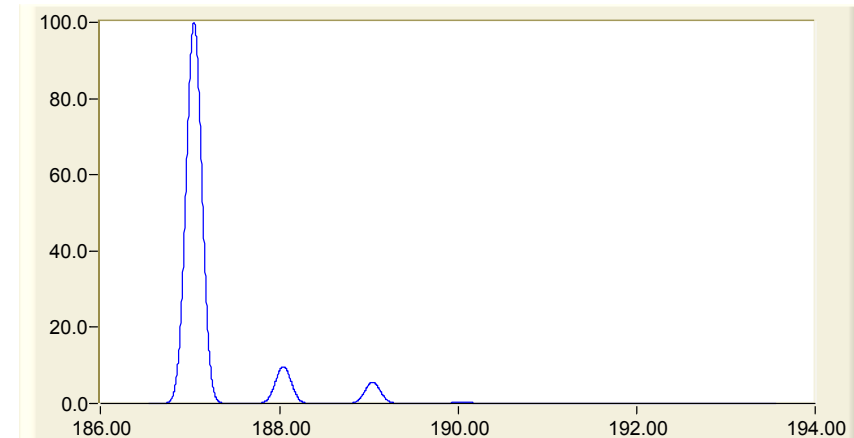

Isotopic Abundances for C<sub>8</sub>H<sub>10</sub>O<sub>3</sub>S

| Mass/Charge | Fraction  | Intensity |
|-------------|-----------|-----------|
| 187.04234   | 0.8633882 | 100.00    |
| 188.04234   | 0.0838995 | 9.72      |
| 189.04234   | 0.0479861 | 5.56      |
| 190.04234   | 0.0040876 | 0.47      |
| 191.04234   | 0.0005949 | 0.07      |
| 192.04234   | 0.0000423 | 0.00      |
| 193.04234   | 0.0000032 | 0.00      |

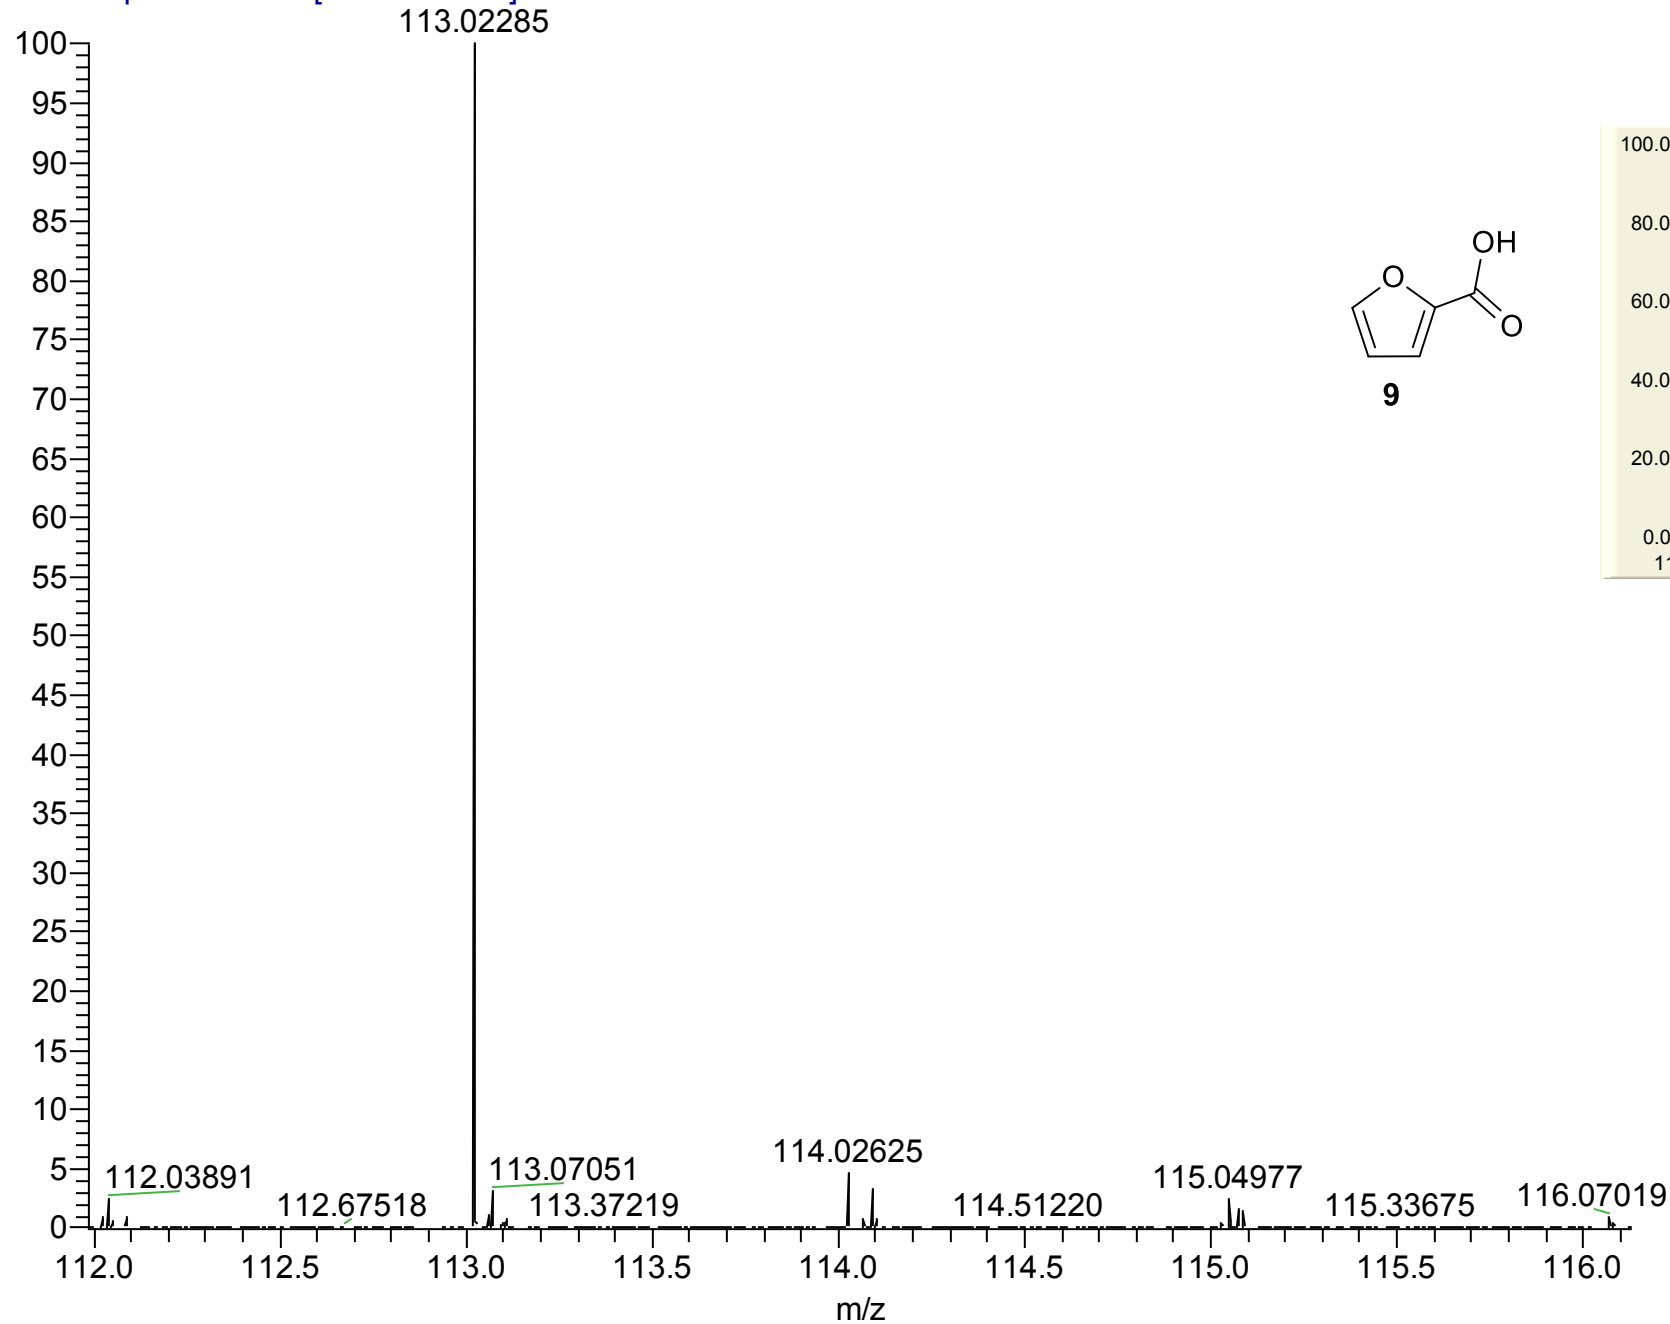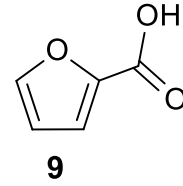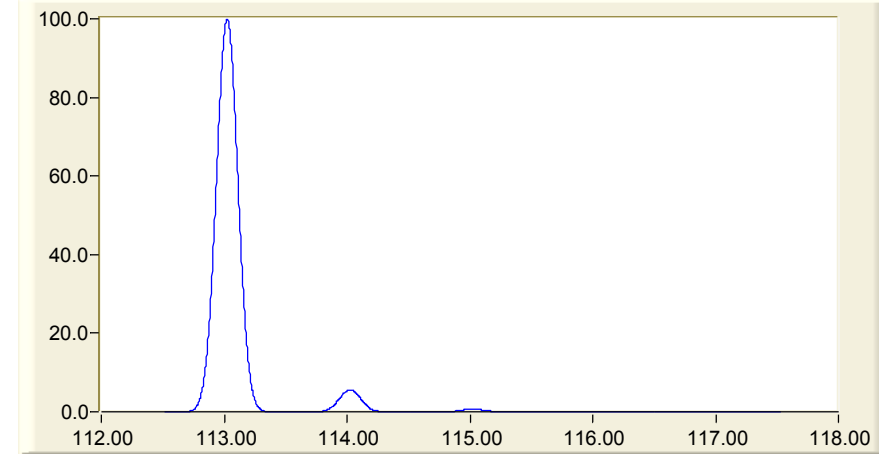

Isotopic Abundances for C5H4O3

| Mass/Charge | Fraction  | Intensity |
|-------------|-----------|-----------|
| 113.02332   | 0.9401768 | 100.00    |
| 114.02332   | 0.0524821 | 5.58      |
| 115.02332   | 0.0069861 | 0.74      |
| 116.02332   | 0.0003352 | 0.04      |
| 117.02332   | 0.0000191 | 0.00      |

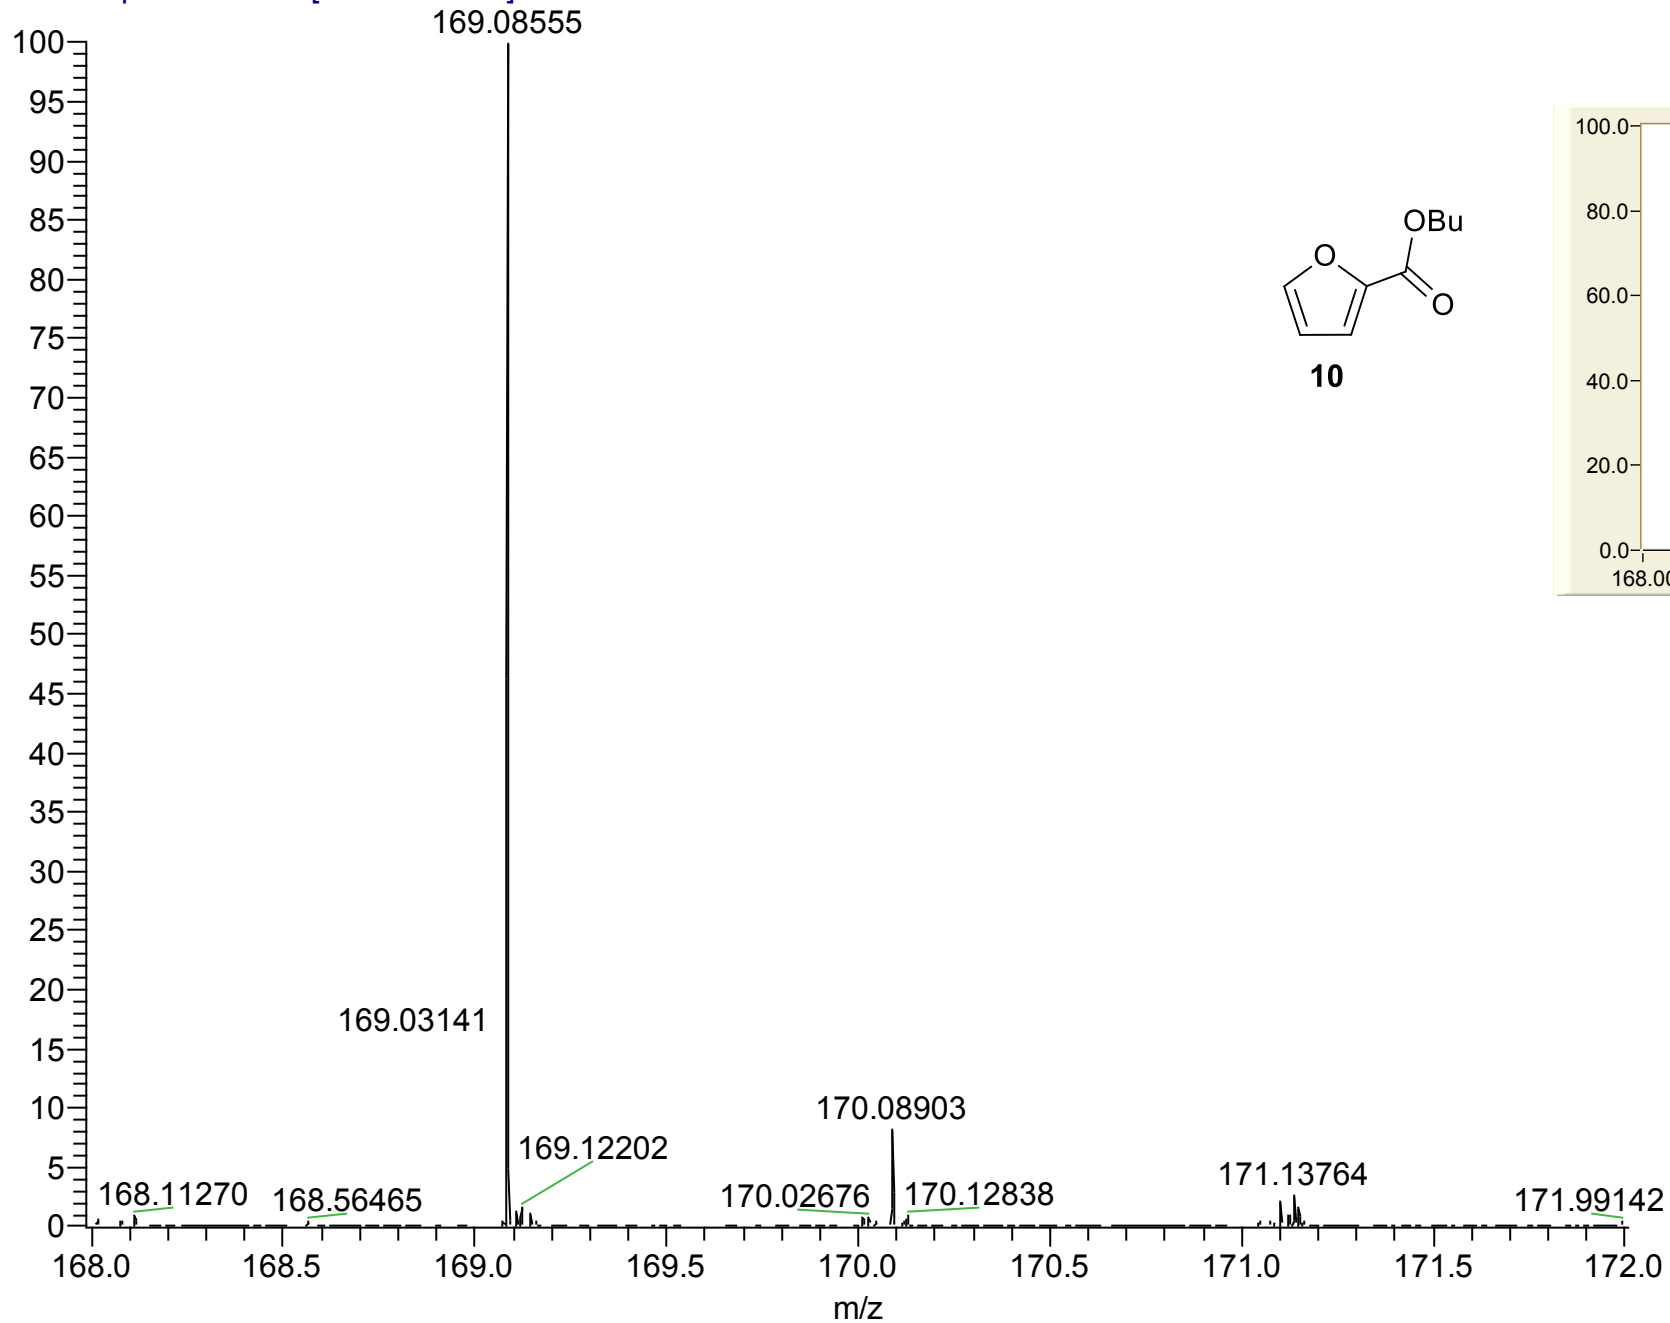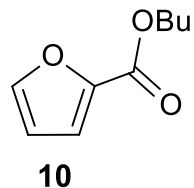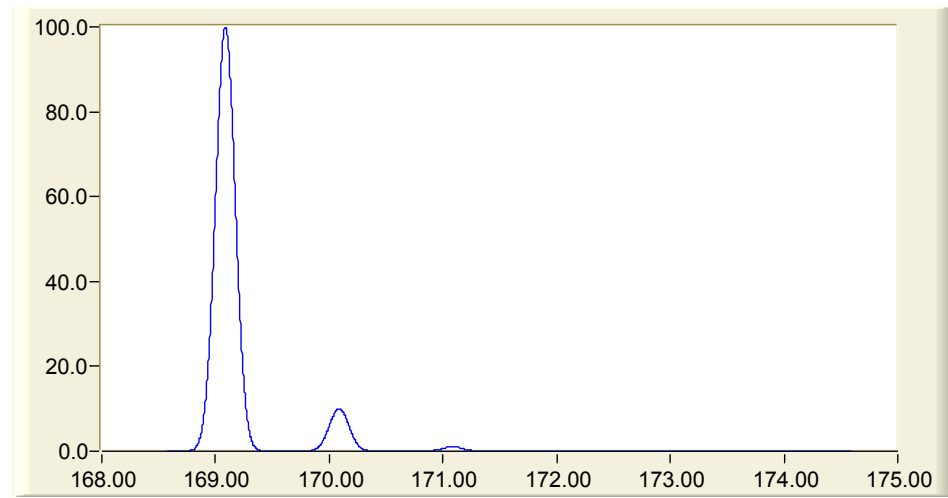

Isotopic Abundances for C<sub>9</sub>H<sub>12</sub>O<sub>3</sub>

| Mass/Charge | Fraction  | Intensity |
|-------------|-----------|-----------|
| 169.08592   | 0.8994982 | 100.00    |
| 170.08592   | 0.0902058 | 10.03     |
| 171.08592   | 0.0095964 | 1.07      |
| 172.08592   | 0.0006613 | 0.07      |
| 173.08592   | 0.0000396 | 0.00      |
| 174.08592   | 0.0000018 | 0.00      |

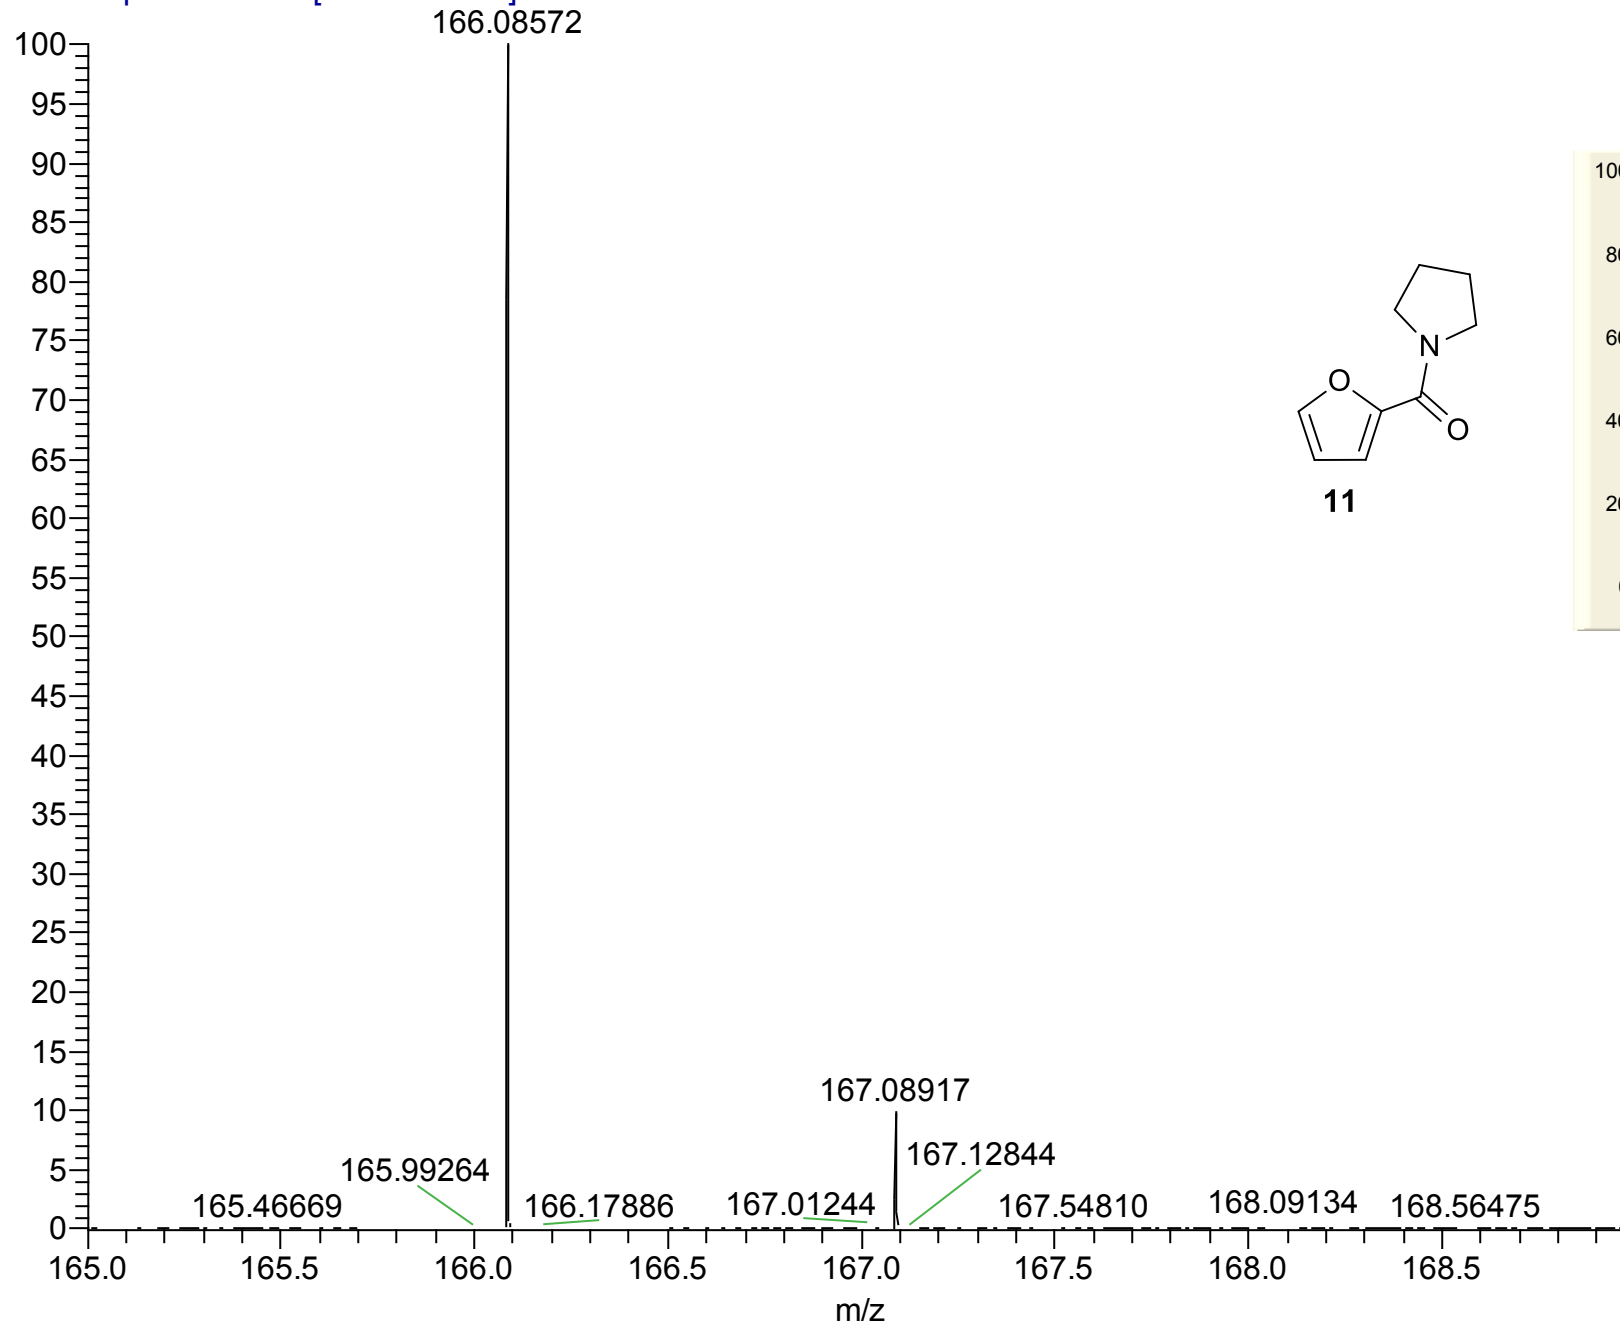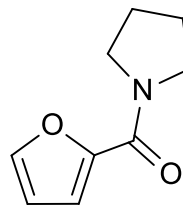

11

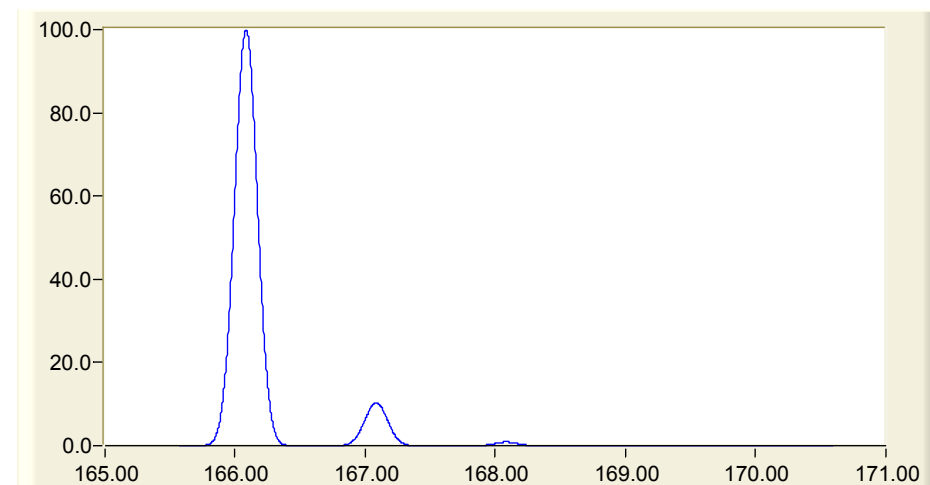

Isotopic Abundances for C<sub>9</sub>H<sub>11</sub>NO<sub>2</sub>

| Mass/Charge | Fraction  | Intensity |
|-------------|-----------|-----------|
| 166.08625   | 0.8985060 | 100.00    |
| 167.08625   | 0.0929480 | 10.34     |
| 168.08625   | 0.0080223 | 0.89      |
| 169.08625   | 0.0005004 | 0.06      |
| 170.08625   | 0.0000252 | 0.00      |



T: FTMS + p ESI Full ms [50.00-500.00]

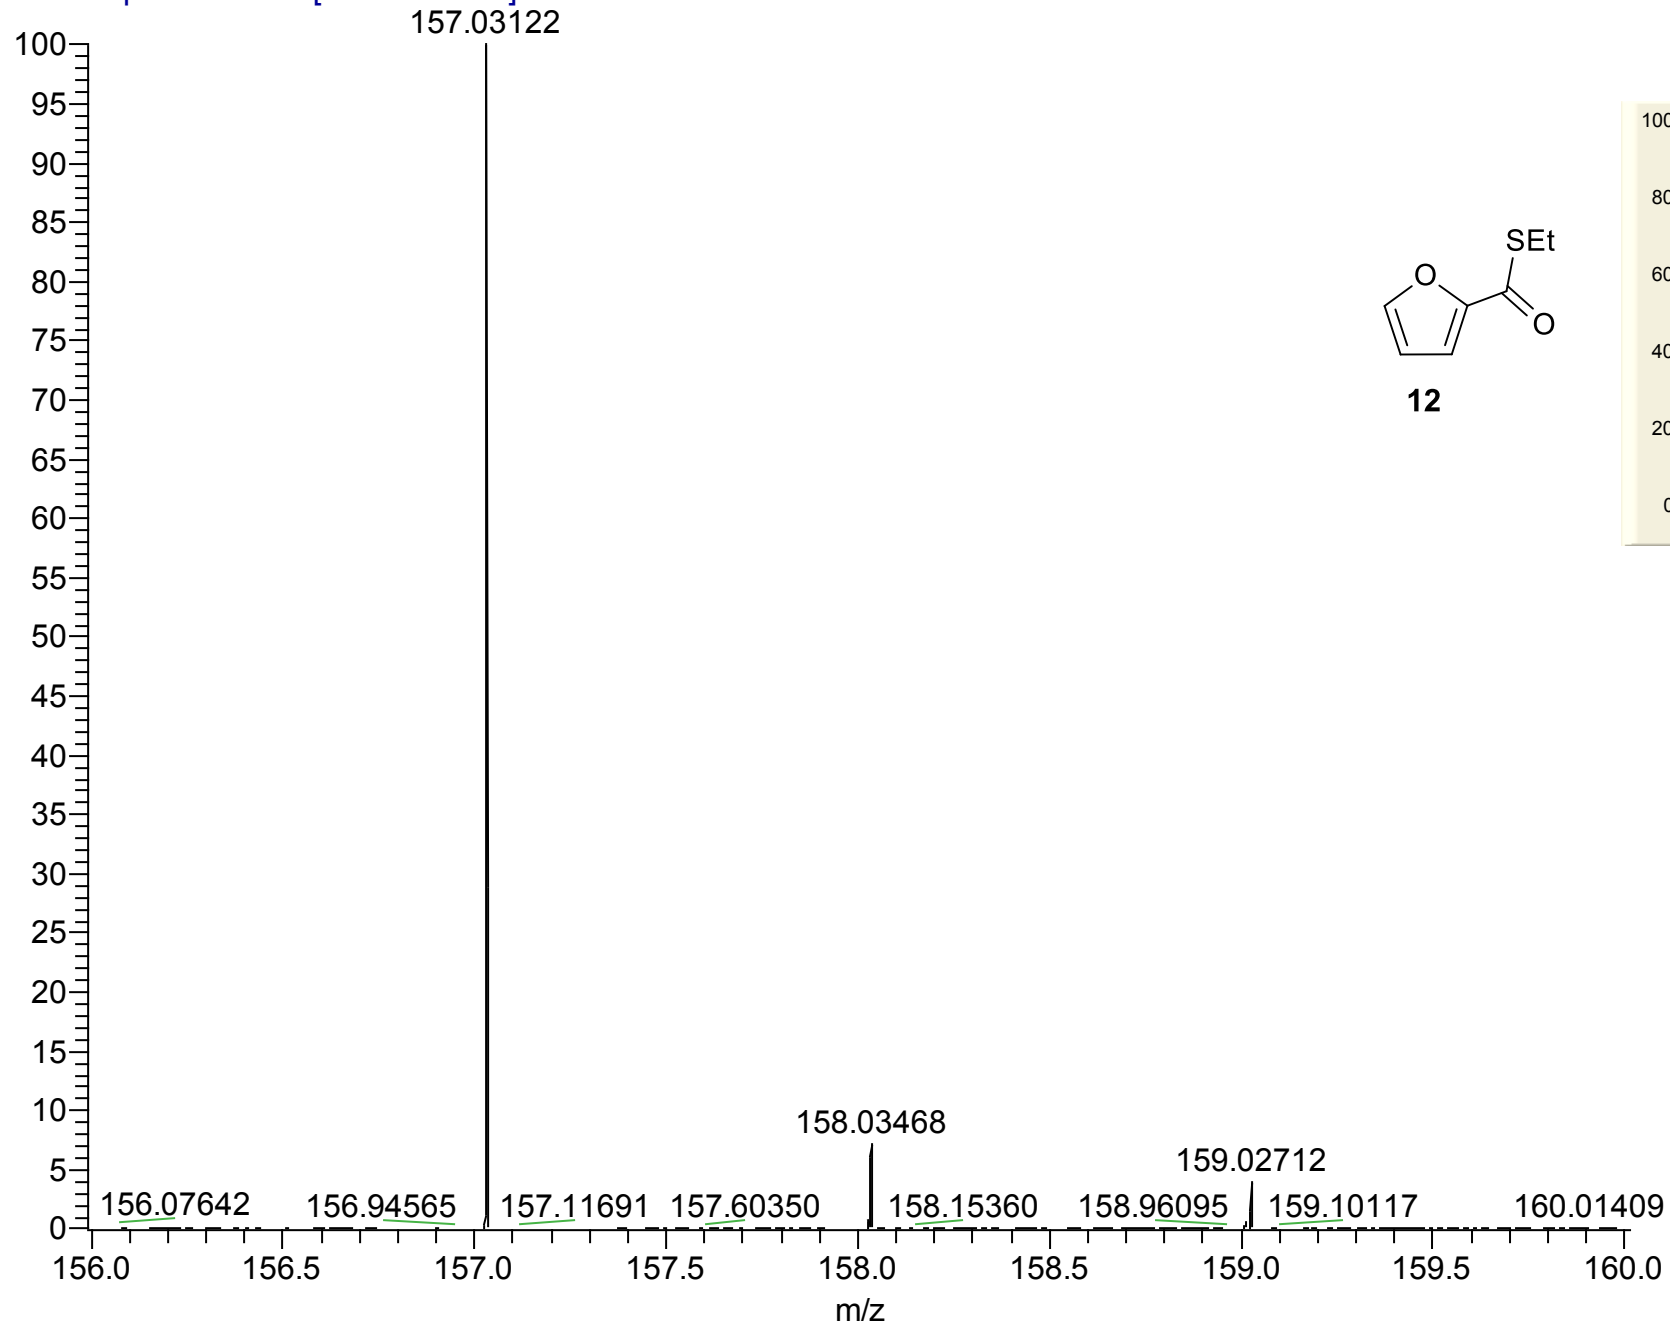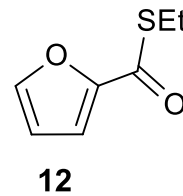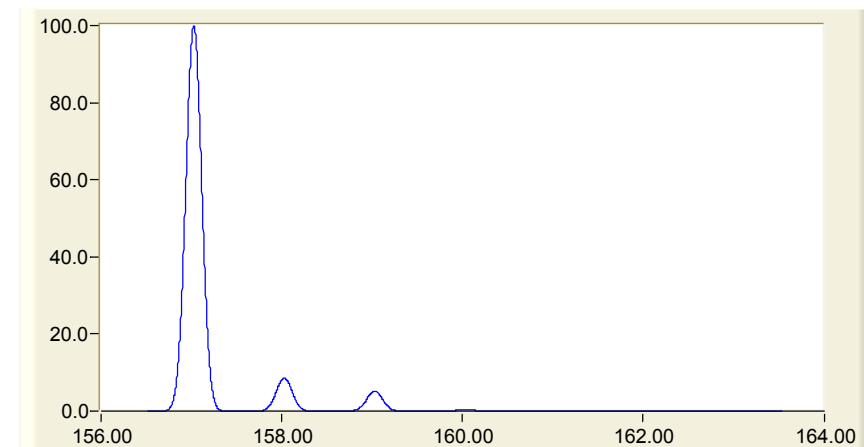Isotopic Abundances for C<sub>7</sub>H<sub>8</sub>O<sub>2</sub>S

| Mass/Charge | Fraction  | Intensity |
|-------------|-----------|-----------|
| 157.03178   | 0.8751148 | 100.00    |
| 158.03178   | 0.0749781 | 8.57      |
| 159.03178   | 0.0459703 | 5.25      |
| 160.03178   | 0.0034399 | 0.39      |
| 161.03178   | 0.0004657 | 0.05      |
| 162.03178   | 0.0000294 | 0.00      |
| 163.03178   | 0.0000018 | 0.00      |
